# Supplementary material for: Burnout experience among healthcare workers post third COVID-19 wave in India; findings of a cross-sectional study
Source: PeerJ journal article supplement (doi:10.7717/peerj.18039), 2024-09-09
Supplement: COVID19_Burnout_Questionnaire.pdf [file COVID19_Burnout_Questionnaire.pdf]

**Questionnaire;** Stress and burnout experience among healthcare workers post third COVID-19 wave in India; findings of a cross-sectional study

\*Please confirm if you have filled the consent form and approved your participation

Yes  No

\*Please confirm, if you were involved in direct patient care during the 3<sup>rd</sup> wave of COVID-19 in India.

Yes  No

General instructions: Please tick most suitable option provided and tick only one option always. We assure confidentiality of your responses. Hence, we kindly request you to respond promptly. Thank you

| Survey informations |                                                                  |                                                    |  |
|---------------------|------------------------------------------------------------------|----------------------------------------------------|--|
| 1                   | Date of filling the survey form                                  |                                                    |  |
| 2                   | On average how much time it took to fill this form?              |                                                    |  |
| 3                   | Please mention the district of your clinical practice and State? |                                                    |  |
| 4                   | Do you suffer from any physical ailments?                        | Yes <input type="radio"/> No <input type="radio"/> |  |

|   |                                                         |                                                                                                                                                                                                                                                                  |  |
|---|---------------------------------------------------------|------------------------------------------------------------------------------------------------------------------------------------------------------------------------------------------------------------------------------------------------------------------|--|
| 5 | What is age?                                            | In years                                                                                                                                                                                                                                                         |  |
| 6 | Please specify your sex?                                | Male <input type="radio"/> Female <input type="radio"/><br>Prefer not to say <input type="radio"/>                                                                                                                                                               |  |
| 7 | Please choose your appropriate marital status?          | Not married yet <input type="radio"/><br>Married <input type="radio"/><br>Divorced/singled <input type="radio"/>                                                                                                                                                 |  |
| 8 | Do you have children? If yes specify the number please? | Yes <input type="radio"/> No <input type="radio"/><br>If yes, _____ number                                                                                                                                                                                       |  |
| 9 | Please select your profession from the list             | Surgeon <input type="radio"/><br>Physician <input type="radio"/><br>Medical resident <input type="radio"/><br>Dentists <input type="radio"/><br>Dentistry resident <input type="radio"/><br>Nurse <input type="radio"/><br>Physiotherapist <input type="radio"/> |  |

|    |                                                                                                                |                                                                                                                                      |  |
|----|----------------------------------------------------------------------------------------------------------------|--------------------------------------------------------------------------------------------------------------------------------------|--|
|    |                                                                                                                | Technician <input type="radio"/>                                                                                                     |  |
|    |                                                                                                                | Others: <u>please specify</u><br>_____                                                                                               |  |
| 10 | Please specify your overall work experience?                                                                   | _____ years                                                                                                                          |  |
| 11 | What are your working hours during the 3 <sup>rd</sup> wave of COVID19 in a typical week?                      | _____ hours/week                                                                                                                     |  |
| 12 | Did you work as a frontline worker during the 3 <sup>rd</sup> wave of COVID19?                                 | Yes <input type="radio"/> No <input type="radio"/>                                                                                   |  |
| 13 | Which of the following work shifts best applies to your work shift during the 3 <sup>rd</sup> wave of COVID19? | Day shift <input type="radio"/><br>Night shift <input type="radio"/><br>Both/Alternative <input type="radio"/>                       |  |
| 14 | Were you test positive for COVID-19 in the now/past?                                                           | Yes <input type="radio"/> No <input type="radio"/>                                                                                   |  |
| 15 | Please specify, your BMI category based on your recent measurements?                                           | Underweight <input type="radio"/><br>Normal <input type="radio"/><br>Overweight <input type="radio"/><br>Obese <input type="radio"/> |  |

**The Copenhagen Burnout Inventory; Part 1 Personal burnout**

"feelings of exhaustion and fatigue on a personal level"

*Please tick one option only*

|                                                               | Always                | Often                 | Sometime<br>s         | Seldom                | Never/almost<br>never |
|---------------------------------------------------------------|-----------------------|-----------------------|-----------------------|-----------------------|-----------------------|
| <i>How often do you feel tired</i>                            | <input type="radio"/> | <input type="radio"/> | <input type="radio"/> | <input type="radio"/> | <input type="radio"/> |
| <i>How often are you physically exhausted?</i>                | <input type="radio"/> | <input type="radio"/> | <input type="radio"/> | <input type="radio"/> | <input type="radio"/> |
| <i>How often are you emotionally exhausted?</i>               | <input type="radio"/> | <input type="radio"/> | <input type="radio"/> | <input type="radio"/> | <input type="radio"/> |
| <i>How often do you think: "I can take it anymore"?</i>       | <input type="radio"/> | <input type="radio"/> | <input type="radio"/> | <input type="radio"/> | <input type="radio"/> |
| <i>How often do you feel worn out?</i>                        | <input type="radio"/> | <input type="radio"/> | <input type="radio"/> | <input type="radio"/> | <input type="radio"/> |
| <i>How often do you feel weak and susceptible to illness?</i> | <input type="radio"/> | <input type="radio"/> | <input type="radio"/> | <input type="radio"/> | <input type="radio"/> |

**The Copenhagen Burnout Inventory; Part 2 Work burnout**

Work burnout is a state of prolonged physical and Psychological exhaustion, which is perceived as related to the person's work.

|                                             | Always                | Often                 | Sometime<br>s         | Seldom                | Never/almost<br>never |
|---------------------------------------------|-----------------------|-----------------------|-----------------------|-----------------------|-----------------------|
| <i>Is your work emotionally exhausting?</i> | <input type="radio"/> | <input type="radio"/> | <input type="radio"/> | <input type="radio"/> | <input type="radio"/> |

|                                                                                |                       |                       |                       |                       |                       |
|--------------------------------------------------------------------------------|-----------------------|-----------------------|-----------------------|-----------------------|-----------------------|
| <i>Do you feel burnt out because of your work?</i>                             | <input type="radio"/> | <input type="radio"/> | <input type="radio"/> | <input type="radio"/> | <input type="radio"/> |
| <i>Does your work frustrate you?</i>                                           | <input type="radio"/> | <input type="radio"/> | <input type="radio"/> | <input type="radio"/> | <input type="radio"/> |
| <i>Do you feel worn out at the end of the working day?</i>                     | <input type="radio"/> | <input type="radio"/> | <input type="radio"/> | <input type="radio"/> | <input type="radio"/> |
| <i>Are you exhausted in the morning at the thought of another day at work?</i> | <input type="radio"/> | <input type="radio"/> | <input type="radio"/> | <input type="radio"/> | <input type="radio"/> |
| <i>Do you feel that every working hour is tiring for you?</i>                  | <input type="radio"/> | <input type="radio"/> | <input type="radio"/> | <input type="radio"/> | <input type="radio"/> |
| <i>Do you have enough energy for family &amp; friends during leisure time?</i> | <input type="radio"/> | <input type="radio"/> | <input type="radio"/> | <input type="radio"/> | <input type="radio"/> |

**The Copenhagen Burnout Inventory; Part 3 Client burnout**

state of Prolonged physical and psychological exhaustion, which is perceived as related to the person's work with clients

|                                                                                            | To very high degree   | To a high degree      | Somewhat              | To a low degree       | To a very low degree  |
|--------------------------------------------------------------------------------------------|-----------------------|-----------------------|-----------------------|-----------------------|-----------------------|
| <i>Do you find it hard to work with client</i>                                             | <input type="radio"/> | <input type="radio"/> | <input type="radio"/> | <input type="radio"/> | <input type="radio"/> |
| <i>Do you feel it frustrating to work with client?</i>                                     | <input type="radio"/> | <input type="radio"/> | <input type="radio"/> | <input type="radio"/> | <input type="radio"/> |
| <i>Does it drain your energy to work with client?</i>                                      | <input type="radio"/> | <input type="radio"/> | <input type="radio"/> | <input type="radio"/> | <input type="radio"/> |
| <i>Do you feel that you give more than you get back when you work with clients?</i>        | <input type="radio"/> | <input type="radio"/> | <input type="radio"/> | <input type="radio"/> | <input type="radio"/> |
| <i>Are you tired of working with clients?</i>                                              | <input type="radio"/> | <input type="radio"/> | <input type="radio"/> | <input type="radio"/> | <input type="radio"/> |
| <i>Do you sometimes wonder how long you will be able to continue working with clients?</i> | <input type="radio"/> | <input type="radio"/> | <input type="radio"/> | <input type="radio"/> | <input type="radio"/> |

Thank you for your time and responses
