# Supplementary material for: Burnout experience among healthcare workers post third COVID-19 wave in India; findings of a cross-sectional study
Source: PeerJ. 2024 Sep 9;12:e18039. doi: 10.7717/peerj.18039 (PMC11391938; doi:10.7717/peerj.18039)
Supplement: Data S1 [file peerj-12-18039-s001.xls]

## Sheet: COVID19India_Burnout dataset
Age	Age_CAT	WorkHours_Week	Profession	Heightcm	Weightkg	Smoking	NumberofChildren	RegularExercise	MaritalStatus	ShiftDuty	ExcessWorkload	QualityofLife_Perception	Q1P1_HowOftenDoYouFeelTired	Q2P2_HowOftenAreYouPhysicallyExhausted	Q3P3_HowOftenAreYouEmotionallyExhausted	Q4P4_HowOftenDoYouThink_ICannotTakeItAnymore	Q5P5_HowOftenDoYouFeelWornOut	Q6P6_HowOftenDoYouFeelWeakandSusceptibleToIllness	Q1W1_IsYourWorkEmotionallyExhausting	Q2W2_DoUFeelBurntOutBecauseofYourWork	Q3W3_DoesYourWorkFrustrateU	Q4W4_DoUFeelWornOutatTheEndofTheWorkingDay	Q5W5_AreUExhaustedinTheMorningAtTheThoughtofAnotherDayAtWork	Q6W6_DoUFeelThatEveryWorkingHourIsTiringForYou	Q7W7_DoUHaveEnoughEnergyForFamilyandFriendsDuringLeisureTime	Q1C1_DoYouFindItHardToWorkWithClients	Q2C2_DoUFindItFrustratingToWorkWithClients	Q3C3_DoesItDrainUREnergyToWorkWithClients	Q4C4_DoUFeelThatUGiveMorethanUgetBackWhenYouWorkWithClients	Q5C5_AreUTiredofWorkingWithClients	Q6C6_DoUSometimesWonderHowLongUwillBeAbleToContinueWorking	BMI	Age_Cateory	Sex	WorkRelated_Burnout_TotalScore	ClientRelated_Burnout_TotalScore	PersonalBurnOut_CAT	Workrelated_CAT	ClientBurnOut_CAT	CovidPositive_Past	PersonalBurnout_TotalScore	WorkHours_CAT	WorkExperience	WorkExP_CAT	Personal_CBIscore_50andOver	Workrelated_CBIscore_50andOver	Clientrelated_CBIscore_50andOver	CBIAveragescore_50andAbove	CBI_AvgScore
43	2	48	2	170	65	1	0	0	1	0	1	2	25	50	50	50	50	50	0	50	50	50	50	50	25	75	50	25	50	50	50	22.4913	1	0	47.2222	41.6667	2	0	0	0	87.5	0	11	2	1	1	0	1	58.7963
32	1	72	2	171	60	0	1	1	1	0	1	3	25	75	50	50	50	75	25	50	25	50	75	75	25	50	50	75	75	50	50	20.5191	1	0	58.3333	83.3333	0	1	2	0	41.6667	2	4	0	0	1	1	1	61.1111
43	2	70	3	183	91	1	1	1	1	0	1	2	0	0	0	0	0	0	0	0	0	0	0	0	100	0	0	0	0	0	0	27.1731	2	0	0	0	0	0	0	0	0	2	4	0	0	0	0	0	0
42	2	30	1	162	89	1	1	0	1	0	1	3	75	0	100	100	100	100	0	75	50	100	100	0	25	50	0	75	0	100	75	33.9125	2	0	66.6667	100	3	3	3	1	66.6667	0	11	2	1	1	1	1	100
44	2	48	6	174	65	0	0	1	1	0	1	2	0	50	75	0	50	75	0	50	0	0	100	75	0	0	0	50	100	100	100	21.4692	1	0	58.3333	58.3333	2	1	1	0	87.5	0	9	1	1	1	1	1	68.0556
42	2	40	4	164	57	0	0	0	1	0	1	1	0	0	0	0	100	50	50	0	100	100	75	0	100	0	0	0	0	25	25	21.1927	1	0	8.33333	8.33333	0	0	0	0	25	0	13	2	0	0	0	0	13.8889
33	1	70	3	164	55	0	0	1	1	0	1	1	75	25	0	75	75	25	25	50	0	0	50	25	100	25	75	0	0	0	0	20.4491	1	0	16.6667	16.6667	2	0	0	0	87.5	2	11	2	1	0	0	0	40.2778
42	2	42	4	176	86	0	0	1	1	0	1	2	50	0	0	0	100	25	0	0	0	25	25	50	75	0	25	25	25	25	25	27.7634	1	0	20.8333	20.8333	0	0	0	0	29.1667	0	11	2	0	0	0	0	23.6111
45	2	70	2	175	81	1	1	0	1	0	1	1	75	25	75	100	100	75	75	75	75	50	50	25	50	75	50	50	50	75	50	26.449	2	0	58.3333	83.3333	0	1	2	0	45.8333	2	19	3	0	1	1	1	62.5
26	0	58	2	180	85	0	1	0	1	2	0	2	100	100	100	100	100	100	0	100	100	100	100	25	0	100	100	25	50	75	50	26.2346	0	0	66.6667	83.3333	2	1	2	1	79.1667	1	4	0	1	1	1	1	77.7778
56	3	30	1	172	84	0	1	1	2	0	1	2	50	25	100	25	75	75	75	50	0	75	0	25	0	25	100	0	25	50	0	28.3937	2	0	0	0	0	0	0	0	0	0	14	2	0	0	0	0	0
43	2	60	3	170	59	0	0	0	0	0	1	2	0	50	50	0	25	50	100	25	100	50	25	0	50	0	75	100	0	100	75	20.4152	2	1	58.3333	45.8333	0	1	0	0	29.1667	1	10	1	0	1	0	0	44.4444
56	3	70	2	176	62	0	0	1	1	0	1	3	100	50	100	0	50	75	100	100	75	50	50	0	0	100	100	100	100	100	50	20.0155	1	0	66.6667	91.6667	2	2	2	0	62.5	2	12	2	1	1	1	1	81.9444
43	2	72	7	146	45	0	0	1	0	0	1	0	50	50	50	0	100	50	100	50	50	50	50	50	50	50	50	50	50	50	100	21.1109	1	0	87.5	66.6667	0	2	2	0	37.5	2	12	2	0	1	1	1	72.2222
42	2	60	6	178	65	1	0	1	0	0	1	0	100	100	100	50	100	100	50	100	25	100	100	25	0	50	100	100	50	25	50	20.5151	0	0	75	62.5	2	2	1	0	91.6667	1	6	1	1	1	1	1	79.1667
31	1	70	6	177	65	1	0	1	0	0	1	1	75	25	100	100	100	0	75	0	100	100	0	25	100	0	25	0	0	0	0	20.7476	0	0	87.5	4.16667	2	2	0	0	66.6667	2	9	1	1	1	0	1	52.7778
27	0	52	7	175	63	0	0	1	0	0	1	1	0	25	75	75	50	75	25	50	0	75	75	25	75	0	100	100	0	50	100	20.5714	0	0	87.5	70.8333	0	2	2	0	41.6667	1	2	0	0	1	1	1	73.6111
29	0	62	3	176	70	0	0	0	0	0	1	1	0	25	0	100	100	25	50	0	25	100	0	50	100	50	25	25	50	25	100	22.5981	0	0	66.6667	100	3	3	3	0	70.8333	2	8	1	1	1	1	1	100
42	2	48	7	158	52	0	2	0	1	0	1	1	0	0	0	25	100	100	75	0	0	25	100	0	0	0	25	100	50	100	75	20.83	1	1	48.6111	41.6667	0	0	0	0	37.5	0	9	1	0	1	0	0	42.5926
43	2	52	3	156	53	0	0	0	2	0	1	0	25	50	75	50	100	75	75	75	50	100	75	0	25	100	50	75	50	75	50	21.7784	1	0	87.5	87.5	2	2	2	0	83.3333	1	7	1	1	1	1	1	86.1111
30	1	48	5	176	65	0	0	0	0	0	1	1	100	50	100	100	75	0	100	50	100	50	100	25	50	25	100	25	75	50	75	20.984	1	0	58.3333	58.3333	1	1	1	0	70.8333	0	6	1	1	1	1	1	62.5
26	0	48	6	171	60	0	0	0	0	0	1	1	0	25	75	25	100	100	50	100	100	0	50	100	0	100	0	100	100	100	25	20.5191	0	1	87.5	70.8333	2	2	1	0	87.5	0	4	0	1	1	1	1	81.9444
29	0	48	7	159	67	0	0	0	0	0	1	1	100	0	50	100	100	100	25	50	0	50	100	50	100	100	100	0	0	50	100	26.5021	0	1	91.6667	91.6667	2	2	2	0	75	0	2	0	1	1	1	1	86.1111
30	1	52	3	164	60	0	0	0	0	0	1	2	25	0	25	50	25	75	0	25	0	0	100	25	25	0	0	25	0	0	0	22.3081	0	0	4.16667	4.16667	0	0	0	0	33.3333	1	5	0	0	0	0	0	13.8889
33	1	48	7	162	57	0	1	1	2	0	1	1	50	25	0	0	100	0	0	0	50	75	50	0	75	100	0	0	75	75	100	21.7193	1	1	58.3333	45.8333	0	1	0	0	29.1667	0	13	2	0	1	0	0	44.4444
30	1	48	6	155	50	0	0	0	0	0	1	1	50	0	0	50	100	100	50	100	0	25	50	0	100	0	100	0	0	0	50	20.8117	0	1	25	25	2	0	0	0	83.3333	0	3	0	1	0	0	0	44.4444
30	1	48	6	170	58	0	0	0	0	0	1	2	25	0	0	50	75	75	0	0	0	100	100	0	100	75	25	100	0	0	25	20.0692	0	1	100	87.5	0	3	2	0	37.5	0	10	1	0	1	1	1	75
42	2	62	7	160	60	0	1	0	1	0	0	1	0	0	50	0	25	50	75	0	100	0	25	25	0	100	25	100	100	0	100	23.4375	2	0	87.5	70.8333	0	2	1	0	20.8333	2	15	2	0	1	1	1	59.7222
27	0	52	3	152	48	0	0	1	0	0	1	2	0	0	25	50	50	50	50	0	0	50	0	25	0	50	25	0	75	75	50	20.7756	0	1	87.5	83.3333	2	2	2	0	83.3333	1	3	0	1	1	1	1	84.7222
51	3	48	7	180	75	0	0	0	1	0	1	1	50	0	0	25	50	75	25	100	50	100	75	25	50	50	100	75	75	75	100	23.1481	2	1	79.1667	79.1667	2	2	2	1	87.5	0	13	2	1	1	1	1	81.9444
28	0	48	7	180	74	0	0	0	0	0	1	3	25	0	0	50	50	75	25	0	100	100	100	0	0	100	100	100	75	100	100	22.8395	0	1	87.5	95.8333	0	2	2	0	33.3333	0	4	0	0	1	1	1	72.2222
42	2	52	7	167	55	0	0	0	1	0	1	2	75	0	75	100	50	75	50	100	0	100	0	0	75	100	100	0	50	100	100	19.721	1	1	87.5	75	1	2	2	0	62.5	1	4	0	1	1	1	1	75
30	1	48	7	164	57	0	0	0	0	0	1	2	50	0	0	100	50	75	100	100	100	100	50	25	25	100	100	100	100	100	75	21.1927	0	0	95.8333	75	0	2	2	0	62.5	0	8	1	0	1	1	1	79.1667
30	1	48	7	178	75	0	0	0	0	0	1	1	25	0	25	50	100	50	0	25	50	25	0	75	100	25	0	50	100	50	100	23.6713	1	0	66.6667	91.6667	0	2	2	0	41.6667	0	8	1	0	1	1	1	72.2222
43	2	48	7	163	59	1	0	1	1	0	1	2	75	50	100	25	50	75	25	50	50	100	75	0	50	0	25	75	50	0	100	22.2063	1	1	41.6667	41.6667	1	0	0	0	62.5	0	9	1	1	0	0	0	48.6111
43	2	48	7	170	65	0	0	1	1	0	1	2	0	100	100	100	100	100	50	100	0	100	50	25	0	100	100	100	100	100	100	22.4913	1	1	83.3333	87.5	2	2	2	0	87.5	0	12	2	1	1	1	1	86.1111
42	2	48	7	160	73	0	0	0	0	0	1	1	25	0	0	0	0	0	75	25	75	25	0	75	100	0	75	0	100	0	100	28.5156	2	1	45.8333	45.8333	0	0	0	1	20.8333	0	12	2	0	0	0	0	31.9444
35	1	48	7	152	50	0	1	0	2	0	1	3	0	75	25	50	100	100	100	0	0	100	100	0	75	100	100	0	25	0	100	21.6413	1	1	54.1667	45.8333	1	1	0	0	58.3333	0	8	1	1	1	0	1	52.7778
31	1	48	6	164	59	0	0	0	0	0	1	1	0	50	0	50	50	75	50	0	0	100	0	0	100	25	100	25	25	0	50	21.9363	0	1	87.5	37.5	2	2	0	0	83.3333	0	4	0	1	1	0	1	69.4444
41	2	48	7	180	70	0	0	0	0	0	1	2	0	0	0	75	0	75	100	100	100	100	50	0	0	100	100	100	100	100	100	21.6049	0	1	91.6667	91.6667	2	2	2	0	87.5	0	13	2	1	1	1	1	90.2778
43	2	62	6	167	60	0	0	0	0	0	1	2	0	0	0	25	100	100	0	0	0	100	75	25	100	0	0	0	50	25	0	21.5139	0	1	87.5	12.5	2	2	0	0	87.5	2	8	1	1	1	0	1	62.5
27	0	48	7	152	48	0	0	1	0	0	1	1	0	25	25	100	0	75	0	0	0	25	50	25	100	0	100	100	100	0	100	20.7756	0	1	87.5	66.6667	0	2	1	0	37.5	0	3	0	0	1	1	1	63.8889
40	2	60	6	166	70	0	0	0	0	0	1	1	0	0	25	0	50	75	100	0	0	0	50	0	50	0	100	50	0	0	0	25.4028	1	1	87.5	87.5	3	2	2	0	100	1	9	1	1	1	1	1	91.6667
42	2	52	7	162	66	0	0	1	1	0	1	3	0	0	0	25	50	75	50	50	0	100	50	50	0	50	100	0	50	0	100	25.1486	1	1	45.8333	37.5	0	0	0	0	25	1	9	1	0	1	0	0	36.1111
31	1	50	5	173	62	0	0	0	1	0	1	1	100	75	50	100	50	75	50	50	0	0	75	0	0	100	100	0	0	50	75	20.7157	1	1	54.1667	45.8333	2	1	0	0	83.3333	1	8	1	1	1	0	1	58.3333
35	1	48	3	155	50	0	0	0	1	0	1	2	0	0	0	25	50	75	25	25	75	25	50	0	0	100	0	25	25	50	50	20.8117	1	1	47.2222	47.2222	0	0	0	0	37.5	0	6	1	0	1	0	0	43.9815
30	1	52	7	179	75	0	0	1	0	0	1	1	100	100	0	0	25	75	0	50	25	100	75	0	0	100	100	0	100	100	100	23.4075	1	1	87.5	91.6667	0	2	2	1	37.5	1	3	0	0	1	1	1	72.2222
30	1	62	6	165	60	0	0	0	0	0	1	1	100	100	0	75	50	25	50	50	50	100	100	100	0	75	75	25	0	75	0	22.0386	0	1	41.6667	41.6667	2	0	0	0	91.6667	2	7	1	1	0	0	1	58.3333
28	0	48	3	168	60	0	0	0	0	0	1	1	0	50	100	0	50	75	100	0	0	100	100	0	100	0	50	50	0	75	50	21.2585	0	1	91.6667	91.6667	2	2	2	1	83.3333	0	3	0	1	1	1	1	88.8889
45	2	60	3	178	65	0	0	0	1	0	1	0	50	50	50	50	50	50	25	50	75	75	50	25	75	25	50	75	25	25	75	20.5151	1	1	45.8333	45.8333	2	0	0	0	87.5	1	7	1	1	0	0	1	59.7222
28	0	70	6	167	60	0	0	0	0	0	1	2	0	0	0	0	100	100	0	0	75	100	25	25	100	100	0	0	0	0	50	21.5139	0	1	87.5	25	2	2	0	0	83.3333	2	5	0	1	1	0	1	63.8889
30	1	58	6	164	56	0	0	1	0	0	1	1	0	0	0	0	25	75	0	0	0	0	0	0	100	0	100	0	0	0	0	20.8209	0	1	87.5	16.6667	2	2	0	0	83.3333	1	6	1	1	1	0	1	59.7222
26	0	48	7	172	60	1	0	1	0	0	1	1	0	25	100	0	0	50	50	25	0	0	0	75	50	25	100	100	0	100	100	20.2812	0	0	70.8333	70.8333	2	1	1	0	87.5	0	3	0	1	1	1	1	77.7778
26	0	48	7	167	63	0	0	0	0	0	1	1	100	100	0	100	50	75	0	50	75	100	75	100	0	50	100	100	100	100	100	22.5896	0	0	75	87.5	2	2	2	0	87.5	0	4	0	1	1	1	1	86.1111
29	0	72	2	167	56	0	0	0	0	0	1	0	75	0	100	75	100	25	75	75	0	100	100	100	0	100	0	25	0	25	75	20.0796	0	0	66.6667	37.5	2	2	0	0	66.6667	2	7	1	1	1	0	1	63.8889
42	2	48	7	164	59	0	1	1	1	0	1	1	25	0	50	50	50	75	50	50	50	75	25	0	50	100	50	100	0	75	100	21.9363	1	0	75	87.5	0	2	2	0	41.6667	0	15	2	0	1	1	1	68.0556
43	2	72	3	171	64	0	1	1	1	0	1	0	100	25	50	0	50	75	25	50	100	50	50	50	0	50	75	50	50	75	50	21.8871	1	0	87.5	66.6667	2	2	2	0	87.5	2	8	1	1	1	1	1	87.5
30	1	30	2	165	57	0	0	1	0	0	1	1	100	100	0	50	25	50	0	25	25	100	100	100	0	50	50	0	0	50	0	20.9366	0	0	25	25	0	0	0	0	45.8333	0	2	0	0	0	0	0	30.5556
51	3	48	7	165	63	0	1	0	1	0	1	1	25	0	50	25	50	75	75	50	75	100	50	0	100	100	100	100	50	50	100	23.1405	2	0	37.5	37.5	0	0	0	0	37.5	0	15	2	0	0	0	0	37.5
31	1	48	7	165	60	0	0	0	0	0	1	2	0	25	25	100	50	75	100	100	100	100	100	25	0	100	100	100	100	100	75	22.0386	0	0	95.8333	75	0	2	2	0	62.5	0	8	1	0	1	1	1	79.1667
30	1	48	7	172	66	0	0	1	0	0	1	1	100	100	0	0	25	75	0	50	25	100	75	0	0	100	100	0	100	100	100	22.3094	0	0	87.5	66.6667	0	2	2	0	37.5	0	9	1	0	1	1	1	69.4444
52	3	72	7	160	72	0	0	0	0	0	1	1	0	0	100	0	25	50	100	0	25	100	50	50	50	75	50	100	50	75	75	28.125	1	1	70.8333	70.8333	0	1	1	0	29.1667	2	10	1	0	1	1	1	56.9444
30	1	48	7	176	65	0	0	1	0	0	1	2	100	100	100	50	50	75	0	75	50	100	100	75	0	0	100	75	100	75	100	20.984	0	1	75	75	2	2	2	0	87.5	0	7	1	1	1	1	1	79.1667
43	2	70	7	176	80	0	1	0	1	0	1	2	0	0	100	75	100	100	75	50	50	100	50	25	0	75	75	100	50	75	75	25.8264	1	1	75	75	1	2	2	0	62.5	2	10	1	1	1	1	1	70.8333
43	2	52	7	152	49	0	0	0	2	0	1	2	0	0	50	50	100	100	75	100	50	100	100	25	0	100	100	100	0	100	75	21.2084	2	1	79.1667	79.1667	0	2	2	0	37.5	1	18	3	0	1	1	1	65.2778
31	1	48	7	153	47	0	0	0	0	0	1	2	50	0	0	50	50	0	0	0	0	0	25	75	50	0	100	100	50	100	100	20.0777	0	1	91.6667	75	0	2	2	0	25	0	8	1	0	1	1	1	63.8889
52	3	58	6	156	53	0	0	0	0	0	1	2	25	25	0	0	0	25	75	25	25	25	25	0	75	0	100	25	0	25	25	21.7784	1	1	87.5	87.5	3	2	2	1	83.3333	1	12	2	1	1	1	1	86.1111
51	3	48	6	150	50	0	0	0	2	0	0	2	0	0	25	0	0	50	25	0	0	50	0	0	75	0	0	75	0	0	0	22.2222	1	1	87.5	87.5	3	2	2	0	100	0	8	1	1	1	1	1	91.6667
30	1	48	7	158	50	0	0	1	0	0	1	3	25	50	25	25	100	25	100	25	0	0	50	25	50	0	25	0	25	25	100	20.0288	0	1	75	29.1667	0	2	0	1	41.6667	0	3	0	0	1	0	0	48.6111
43	2	48	3	171	60	0	0	1	2	0	0	2	50	0	50	25	50	25	0	0	0	50	0	0	50	25	25	25	100	75	50	20.5191	2	0	87.5	83.3333	2	2	2	0	83.3333	0	10	1	1	1	1	1	87.5
56	3	48	6	160	58	0	2	1	1	0	1	3	100	100	100	50	100	100	100	100	25	100	100	25	0	0	100	100	0	25	25	22.6562	2	0	87.5	87.5	2	2	2	1	83.3333	0	17	3	1	1	1	1	88.8889
40	2	48	7	182	80	0	0	1	1	0	0	2	100	100	100	100	100	100	50	100	100	100	100	25	0	25	100	100	100	100	100	24.1517	1	1	83.3333	100	2	2	3	0	87.5	0	11	2	1	1	1	1	90.2778
30	1	60	6	170	61	1	0	1	0	2	1	1	100	100	100	75	25	0	25	25	0	25	50	50	50	75	50	0	0	25	50	21.1073	1	0	87.5	33.3333	1	2	0	0	66.6667	1	10	1	1	1	0	1	62.5
40	2	70	6	183	100	0	0	1	1	0	1	1	100	25	25	100	100	100	50	100	50	100	100	25	0	0	25	100	50	100	25	29.8606	1	1	87.5	41.6667	2	2	0	0	83.3333	2	7	1	1	1	0	1	70.8333
30	1	50	5	175	71	0	0	0	0	0	0	1	0	0	50	75	50	75	25	50	50	100	0	0	75	25	0	0	100	25	75	23.1837	1	0	83.3333	100	2	3	1	0	83.3333	1	10	1	1	1	1	1	100
26	0	48	6	168	60	0	0	0	0	0	0	3	50	75	75	75	100	75	0	100	0	75	100	0	0	0	100	75	0	25	0	21.2585	0	1	33.3333	87.5	2	0	2	0	83.3333	0	4	0	1	0	0	1	65.2778
44	2	62	6	166	59	0	0	0	1	0	1	0	0	100	25	100	100	100	0	0	25	100	0	100	50	25	50	100	0	0	0	21.4109	1	1	87.5	87.5	2	2	2	0	87.5	2	10	1	1	1	1	1	87.5
44	2	60	6	173	63	0	1	0	1	0	0	2	0	0	0	25	0	75	100	25	0	25	50	25	100	0	100	100	0	100	0	21.0498	1	1	47.2222	91.6667	3	0	2	0	83.3333	1	6	1	1	1	0	1	74.0741
42	2	72	3	183	84	0	0	0	0	0	1	0	100	100	0	75	100	25	75	50	25	75	100	0	50	25	25	0	100	100	50	25.0829	1	1	50	91.6667	2	1	2	0	91.6667	2	1	0	1	1	1	1	77.7778
42	2	72	6	174	62	0	1	0	1	0	0	3	75	75	50	50	100	100	25	100	50	50	100	0	0	25	100	100	25	25	25	20.4783	1	1	87.5	91.6667	2	2	2	0	75	2	11	2	1	1	1	1	84.7222
45	2	48	6	180	70	1	1	0	1	0	1	0	100	0	0	100	100	100	0	0	100	50	100	100	50	100	100	100	100	100	100	21.6049	1	0	87.5	75	2	2	2	0	66.6667	0	10	1	1	1	1	1	80.5556
51	3	48	7	163	59	0	1	0	1	0	1	1	0	0	50	0	50	25	0	50	25	0	25	50	75	100	50	50	100	100	75	22.2063	2	0	20.8333	20.8333	0	0	0	0	20.8333	0	19	3	0	0	0	0	20.8333
52	3	52	7	152	52	0	0	0	0	0	1	1	100	50	75	25	100	0	75	50	100	100	0	100	25	50	75	0	50	100	75	22.5069	2	0	58.3333	45.8333	1	1	0	0	58.3333	1	19	3	1	1	0	1	54.1667
30	1	48	7	160	60	0	0	0	0	0	1	1	100	25	50	50	100	0	100	25	100	100	0	100	50	75	50	0	50	100	75	23.4375	1	0	58.3333	45.8333	0	1	0	0	45.8333	0	3	0	0	1	0	0	48.6111
55	3	48	7	171	66	0	1	0	1	0	1	1	0	0	0	100	25	0	25	0	25	0	0	50	100	0	25	50	100	50	100	22.571	1	0	87.5	87.5	0	2	2	0	20.8333	0	11	2	0	1	1	1	65.2778
42	2	70	3	152	48	0	0	0	1	0	1	1	0	0	0	0	25	0	100	0	0	0	50	0	75	25	50	25	0	0	75	20.7756	1	0	29.1667	87.5	2	0	2	0	87.5	2	7	1	1	0	0	1	68.0556
27	0	52	5	179	72	0	0	0	1	0	1	0	0	0	25	75	75	75	50	25	75	100	50	25	25	25	100	25	75	25	75	22.4712	1	0	79.1667	87.5	2	2	2	0	79.1667	1	3	0	1	1	1	1	83.3333
34	1	70	3	150	52	0	0	0	1	0	1	1	0	0	75	0	75	50	0	0	0	75	75	0	50	0	0	75	0	0	0	23.1111	2	0	12.5	12.5	0	0	0	1	33.3333	2	4	0	0	0	0	0	19.4444
57	3	60	6	166	60	0	1	0	1	0	1	1	25	25	25	25	25	25	50	25	100	25	25	25	75	25	75	25	0	0	25	21.7738	1	0	47.2222	47.2222	0	0	0	0	47.2222	1	13	2	0	0	0	0	47.2222
31	1	58	6	182	68	1	0	1	1	0	1	1	100	100	100	25	25	25	25	100	25	100	100	50	0	25	100	100	25	25	100	20.5289	1	0	87.5	75	1	2	1	0	62.5	1	8	1	1	1	1	1	70.8333
26	0	52	5	170	61	0	0	0	0	0	1	2	25	50	100	25	100	50	25	75	25	75	75	50	50	75	50	50	75	25	75	21.1073	0	0	87.5	70.8333	1	2	2	0	58.3333	1	4	0	1	1	1	1	77.7778
40	2	48	7	164	57	0	0	0	1	0	0	0	50	0	50	25	100	25	0	25	0	25	100	100	75	100	25	100	100	50	100	21.1927	1	0	79.1667	87.5	0	2	2	0	41.6667	0	5	0	0	1	1	1	69.4444
42	2	48	7	156	70	0	0	0	1	0	1	3	50	100	100	50	100	100	25	0	25	100	100	25	100	50	100	100	50	75	75	28.764	2	0	75	75	2	2	2	0	79.1667	0	20	3	1	1	1	1	77.7778
53	3	62	6	170	64	0	1	1	2	0	1	0	50	25	25	25	25	50	25	50	50	25	25	25	75	50	50	50	25	50	25	22.1453	1	0	75	87.5	2	2	2	0	87.5	2	12	2	1	1	1	1	83.3333
42	2	48	3	160	59	0	1	0	1	0	1	1	0	0	0	50	50	50	0	0	0	50	0	0	100	0	0	0	25	0	75	23.0469	2	0	16.6667	100	2	0	3	0	87.5	0	9	1	1	0	0	1	68.0556
30	1	48	3	176	68	0	0	0	0	0	1	1	75	25	25	75	50	0	50	0	100	25	25	75	75	0	25	50	50	0	0	21.9525	0	1	87.5	91.6667	2	2	2	1	91.6667	0	10	1	1	1	1	1	90.2778
37	1	70	3	164	57	0	1	0	1	0	1	0	0	25	25	0	25	0	0	75	0	0	0	0	100	25	100	0	100	75	50	21.1927	1	1	87.5	83.3333	2	2	2	0	91.6667	2	10	1	1	1	1	1	87.5
42	2	52	7	164	66	0	0	0	1	0	1	2	50	25	75	25	25	75	100	100	75	0	0	50	0	0	100	100	25	75	100	24.539	1	1	66.6667	66.6667	0	1	1	1	45.8333	1	6	1	0	1	1	1	59.7222
29	0	48	7	174	62	0	0	0	1	0	1	0	0	75	75	0	25	25	25	25	50	0	100	25	75	0	25	0	100	25	100	20.4783	0	0	83.3333	41.6667	0	2	0	0	33.3333	0	4	0	0	1	0	1	52.7778
56	3	70	7	164	91	0	0	1	1	0	1	1	50	50	50	100	25	50	25	50	75	25	0	25	100	0	25	0	100	0	100	33.834	1	1	37.5	37.5	0	0	0	0	41.6667	2	12	2	0	0	0	0	38.8889
42	2	60	7	171	65	1	0	0	1	0	1	0	25	0	0	0	50	50	0	0	75	0	0	100	100	25	0	0	50	50	100	22.2291	2	0	87.5	87.5	0	2	2	0	20.8333	1	14	2	0	1	1	1	65.2778
30	1	40	4	165	71	0	0	0	0	0	1	0	50	25	25	0	50	0	0	0	50	25	0	25	25	75	25	0	0	0	50	26.079	0	0	87.5	70.8333	2	2	2	0	87.5	0	10	1	1	1	1	1	87.5
27	0	48	6	165	60	0	0	0	0	0	1	1	100	100	75	0	100	0	25	50	0	75	25	100	75	25	50	25	0	100	0	22.0386	0	0	33.3333	33.3333	2	0	0	0	87.5	0	3	0	1	0	0	1	52.7778
31	1	48	3	163	59	0	0	0	0	0	0	1	0	0	100	75	100	100	100	100	0	0	100	25	0	100	50	100	100	50	50	22.2063	2	0	66.6667	75	1	2	2	0	66.6667	0	8	1	1	1	1	1	76.3889
30	1	60	6	160	59	0	0	0	0	0	1	2	100	25	100	50	100	50	100	0	0	100	50	0	50	0	100	0	25	0	50	23.0469	1	1	87.5	29.1667	2	2	0	1	83.3333	1	10	1	1	1	0	1	66.6667
27	0	48	6	160	67	0	0	0	0	0	1	1	0	0	0	0	25	0	25	0	0	25	0	0	50	0	0	0	0	0	0	26.1719	0	0	87.5	0	0	2	0	0	16.6667	0	4	0	0	1	0	0	30.5556
30	1	48	6	150	50	0	0	0	0	0	1	0	0	50	100	0	100	50	0	25	25	25	0	50	100	0	50	0	25	0	0	22.2222	0	1	12.5	100	0	0	3	1	41.6667	0	3	0	0	0	0	1	51.3889
56	3	60	6	151	52	1	2	0	1	0	1	0	100	50	25	0	0	25	50	50	100	0	50	0	75	50	100	100	100	0	50	22.806	1	1	87.5	66.6667	0	2	1	0	33.3333	1	13	2	0	1	1	1	62.5
30	1	72	6	170	62	0	0	0	0	0	1	1	100	0	25	0	100	50	100	0	100	50	50	0	50	0	25	25	25	25	0	21.4533	0	1	87.5	16.6667	2	2	0	0	83.3333	2	7	1	1	1	0	1	59.7222
28	0	58	3	170	71	0	0	0	0	0	1	1	0	75	100	100	75	25	75	0	100	25	100	75	0	50	100	50	50	75	50	24.5675	0	0	83.3333	66.6667	2	2	2	1	70.8333	1	7	1	1	1	1	1	88.8889
42	2	48	3	156	53	0	0	1	1	0	1	1	0	75	50	0	100	75	0	0	0	0	0	25	100	50	0	0	50	0	75	21.7784	1	1	29.1667	79.1667	2	0	2	0	87.5	0	10	1	1	0	0	1	65.2778
30	1	52	5	152	50	0	0	0	0	0	1	0	100	25	75	25	100	75	75	75	0	25	0	0	25	0	100	75	25	25	75	21.6413	0	1	87.5	91.6667	2	2	2	1	91.6667	1	8	1	1	1	1	1	90.2778
30	1	60	6	167	65	1	0	1	0	0	1	1	100	25	100	50	75	25	75	0	100	0	75	50	0	0	50	100	25	75	0	23.3067	1	0	41.6667	41.6667	2	0	0	0	87.5	1	4	0	1	0	0	1	58.3333
28	0	48	5	164	60	1	0	1	0	0	1	1	50	0	75	0	100	100	0	25	50	50	50	0	50	0	100	100	25	50	75	22.3081	0	0	58.3333	45.8333	0	1	0	0	45.8333	0	2	0	0	1	0	1	50
26	0	48	7	179	72	1	0	1	0	0	1	0	0	0	25	25	25	0	25	0	0	0	50	0	75	0	50	50	0	100	75	22.4712	0	0	45.8333	45.8333	0	0	0	0	12.5	0	3	0	0	0	0	0	34.7222
31	1	52	7	167	80	1	0	0	0	0	1	0	0	50	0	0	25	0	50	25	25	25	25	50	0	50	0	25	75	0	100	28.6851	0	1	41.6667	41.6667	0	0	0	0	29.1667	1	9	1	0	0	0	0	31.9444
30	1	62	3	156	53	0	0	0	0	0	1	0	0	25	25	75	100	0	50	100	25	0	25	0	75	25	25	25	50	0	75	21.7784	0	1	33.3333	33.3333	0	0	0	0	33.3333	2	4	0	0	0	0	0	34.7222
42	2	70	6	155	52	0	0	0	0	0	1	2	0	0	25	50	50	0	75	0	50	25	25	25	100	0	0	25	0	0	25	21.6441	1	1	8.33333	100	2	0	3	1	87.5	2	7	1	1	0	0	1	65.2778
30	1	48	3	173	62	0	0	0	0	0	1	1	50	75	0	25	0	0	50	100	0	25	25	0	75	0	0	25	0	0	75	20.7157	0	0	16.6667	100	2	0	3	0	87.5	0	7	1	1	0	0	1	68.0556
55	3	48	6	176	72	0	0	0	0	0	1	1	75	75	0	75	75	75	25	100	25	25	25	0	25	0	50	25	25	25	25	23.2438	2	0	87.5	75	1	2	2	0	62.5	0	15	2	1	1	1	1	79.1667
30	1	48	7	150	50	0	0	0	0	0	1	2	0	25	25	0	100	50	0	0	25	100	100	0	0	25	50	100	25	0	100	22.2222	0	1	45.8333	37.5	0	0	0	0	33.3333	0	8	1	0	1	0	0	38.8889
44	2	72	6	175	72	0	1	0	1	0	1	1	0	0	0	50	75	50	0	0	0	0	100	0	100	0	50	0	50	0	25	23.5102	1	0	62.5	87.5	0	2	2	1	29.1667	2	12	2	0	1	1	1	69.4444
28	0	50	5	176	72	0	1	0	1	0	1	0	0	0	25	25	0	50	25	0	25	25	75	0	100	25	0	50	100	50	75	23.2438	2	0	45.8333	37.5	0	0	0	0	16.6667	1	3	0	0	1	0	0	33.3333
35	1	48	7	157	86	0	1	0	1	0	1	0	25	0	0	0	0	0	25	0	0	100	50	0	100	25	25	0	0	100	100	34.8899	1	1	41.6667	41.6667	2	0	0	0	87.5	0	7	1	1	0	0	1	56.9444
42	2	52	7	150	47	0	0	0	1	0	1	1	25	0	75	75	100	100	100	75	0	100	100	0	50	0	100	25	25	100	100	20.8889	1	1	58.3333	58.3333	2	1	1	0	91.6667	1	8	1	1	1	1	1	69.4444
43	2	70	6	152	47	0	0	0	1	0	1	0	0	0	100	25	100	25	0	25	25	25	25	25	100	50	25	0	25	0	25	20.3428	2	1	87.5	87.5	2	2	2	0	83.3333	2	10	1	1	1	1	1	86.1111
55	3	70	6	176	70	0	1	0	2	0	1	2	0	0	0	0	0	0	75	0	0	100	0	25	100	0	100	0	0	0	0	22.5981	1	1	0	0	0	0	0	0	0	2	13	2	0	0	0	0	0
56	3	48	7	157	57	0	1	0	2	0	1	1	25	50	25	75	100	0	75	0	0	100	100	0	100	0	50	0	100	0	100	23.1247	2	1	41.6667	41.6667	0	0	0	0	45.8333	0	12	2	0	0	0	0	43.0556
26	0	48	6	165	58	0	0	0	0	0	1	2	100	25	50	75	25	25	0	0	25	75	100	50	0	50	50	50	100	100	0	21.3039	0	0	58.3333	83.3333	2	1	2	0	#NULL!	0	4	0	1	1	1	1	77.7778
31	1	48	7	157	54	0	0	0	0	0	1	0	0	0	50	100	100	50	25	0	0	25	25	0	100	100	50	0	0	0	100	21.9076	0	1	41.6667	41.6667	0	0	0	0	41.6667	0	10	1	0	0	0	0	41.6667
29	0	52	5	159	58	0	0	0	0	0	1	0	0	0	50	100	100	25	100	0	25	50	25	100	75	25	25	25	100	25	75	22.9421	0	1	83.3333	45.8333	2	3	0	0	87.5	1	3	0	1	1	0	1	72.2222
31	1	72	6	165	54	0	0	0	0	0	0	2	100	0	25	75	25	25	25	0	50	50	50	25	25	25	100	25	100	100	0	19.8347	0	1	58.3333	83.3333	2	1	2	0	83.3333	2	8	1	1	1	1	1	75
36	1	70	6	162	55	0	1	0	1	0	1	0	100	0	100	75	100	100	0	100	50	25	25	50	0	50	50	50	100	100	0	20.9572	1	0	58.3333	83.3333	2	1	2	0	79.1667	2	11	2	1	1	1	1	73.6111
32	1	48	6	188	71	1	0	1	0	0	1	3	100	100	25	0	100	75	50	100	0	75	100	0	0	100	100	0	0	25	0	20.0883	0	0	37.5	87.5	1	0	2	0	66.6667	0	8	1	1	0	0	1	63.8889
57	3	48	7	182	75	0	0	0	1	0	1	0	100	0	0	25	0	0	50	25	25	50	25	0	75	50	100	0	0	100	100	22.6422	1	1	58.3333	58.3333	2	1	1	0	91.6667	0	13	2	1	1	1	1	69.4444
56	3	60	6	160	52	0	2	0	2	0	1	1	0	0	0	0	75	75	25	50	0	75	100	0	50	0	0	25	0	0	50	20.3125	2	1	87.5	12.5	3	2	0	0	100	1	13	2	1	1	0	1	66.6667
40	2	60	3	155	50	0	0	0	0	0	1	2	0	50	0	75	100	25	50	75	75	0	100	25	0	25	25	25	50	75	50	20.8117	0	1	91.6667	91.6667	2	2	2	0	83.3333	1	9	1	1	1	1	1	88.8889
30	1	52	7	158	52	0	0	0	0	0	1	0	100	0	0	75	100	25	75	25	50	0	25	25	50	0	25	25	100	25	100	20.83	0	0	87.5	66.6667	0	2	2	0	37.5	1	10	1	0	1	1	1	70.8333
43	2	48	7	164	55	0	0	0	0	0	1	2	0	0	0	0	100	100	25	50	50	100	0	0	75	25	50	0	0	0	100	20.4491	0	1	29.1667	29.1667	0	0	0	0	37.5	0	13	2	0	0	0	0	30.5556
40	2	48	3	158	50	0	0	0	0	0	0	1	0	0	100	25	100	25	0	50	0	0	0	0	75	50	25	0	0	25	75	20.0288	2	1	29.1667	29.1667	2	0	0	0	83.3333	0	9	1	1	0	0	0	47.2222
45	2	48	6	157	64	0	0	0	0	0	0	2	0	0	50	100	50	0	100	0	0	0	25	0	50	25	25	0	0	0	50	25.9645	0	0	87.5	16.6667	3	2	0	0	87.5	0	7	1	1	1	0	1	68.0556
31	1	70	3	166	75	0	0	0	0	0	1	0	100	25	0	25	100	25	75	100	75	100	0	50	100	0	75	0	0	25	75	27.2173	0	0	29.1667	29.1667	2	0	0	0	83.3333	2	10	1	1	0	0	0	47.2222
30	1	62	6	155	50	0	0	0	0	0	1	2	100	100	100	0	100	100	100	100	100	100	100	0	0	100	100	100	0	0	0	20.8117	0	0	87.5	75	2	2	2	0	62.5	2	8	1	1	1	1	1	87.5
30	1	48	6	172	70	0	0	0	0	0	1	2	50	25	100	50	100	50	25	100	50	50	0	0	75	50	50	25	0	50	50	23.6614	1	0	37.5	37.5	1	0	0	0	62.5	0	6	1	1	0	0	0	45.8333
42	2	48	7	172	60	0	0	0	1	0	1	1	0	25	50	0	25	75	100	25	100	25	0	0	25	0	100	50	0	25	100	20.2812	1	0	83.3333	45.8333	0	2	0	0	29.1667	0	4	0	0	1	0	1	52.7778
28	0	70	6	170	62	0	0	0	0	0	0	3	100	100	25	100	100	100	0	100	0	100	100	0	0	50	50	100	0	25	25	21.4533	0	0	87.5	75	2	2	2	0	62.5	2	9	1	1	1	1	1	87.5
44	2	32	1	173	112	0	0	0	1	0	1	2	75	100	50	50	100	0	100	0	100	25	100	75	50	0	100	100	100	100	100	37.4219	2	0	66.6667	100	3	3	3	0	66.6667	0	7	1	1	1	1	1	100
30	1	40	4	149	50	0	0	0	0	0	0	1	25	25	25	0	100	25	50	0	25	100	50	0	50	100	50	25	75	0	25	22.5215	0	1	45.8333	45.8333	0	0	0	0	33.3333	0	7	1	0	0	0	0	41.6667
56	3	72	6	160	60	0	1	0	1	0	0	2	0	75	75	50	50	75	50	100	25	100	75	25	0	0	100	25	50	0	25	23.4375	1	1	87.5	87.5	1	2	2	0	54.1667	2	11	2	1	1	1	1	76.3889
29	0	52	5	161	62	0	2	1	1	0	1	2	0	25	0	0	100	50	25	25	25	50	100	0	100	25	75	100	25	100	75	23.9188	1	1	87.5	87.5	2	2	2	0	87.5	1	4	0	1	1	1	1	87.5
33	1	40	4	174	86	0	0	1	1	0	1	2	0	25	50	25	0	0	25	0	25	0	25	0	75	25	50	25	50	50	25	28.4053	1	0	37.5	87.5	0	0	2	0	16.6667	0	4	0	0	0	0	0	47.2222
26	0	52	6	164	55	0	0	0	0	0	1	2	0	100	25	50	100	25	25	0	50	100	0	25	75	0	0	0	25	50	0	20.4491	0	1	100	87.5	3	3	2	0	100	1	4	0	1	1	1	1	95.8333
56	3	30	1	167	80	1	1	0	1	0	0	1	75	75	75	50	100	75	50	75	50	100	75	75	0	75	75	75	75	75	75	28.6851	1	0	0	0	3	0	0	0	87.5	0	9	1	1	0	0	0	29.1667
26	0	60	6	154	52	0	0	0	0	0	0	2	0	0	0	100	25	75	0	0	75	25	0	0	0	0	0	0	0	0	0	21.9261	0	1	0	0	0	0	0	0	33.3333	1	3	0	0	0	0	0	11.1111
30	1	48	6	170	64	0	0	0	0	0	0	2	100	75	100	25	100	25	25	100	25	100	100	50	0	50	100	75	0	100	100	22.1453	0	0	70.8333	70.8333	1	1	1	0	70.8333	0	10	1	1	1	1	1	70.8333
30	1	50	5	164	57	0	0	1	1	0	0	2	75	50	75	100	100	50	25	50	25	50	50	50	75	50	100	75	0	50	75	21.1927	1	1	58.3333	58.3333	2	1	1	0	83.3333	1	7	1	1	1	1	1	63.8889
43	2	70	6	172	67	0	0	0	0	0	0	2	75	75	100	75	100	100	25	75	25	100	75	0	50	0	25	100	0	100	0	22.6474	2	1	37.5	87.5	2	0	2	1	87.5	2	14	2	1	0	0	1	70.8333
51	3	60	3	155	100	0	0	0	1	0	1	0	25	0	0	0	100	0	25	50	0	50	25	75	100	50	100	0	100	0	0	41.6233	1	0	87.5	70.8333	2	2	2	1	87.5	1	18	3	1	1	1	1	87.5
42	2	70	6	176	65	1	0	0	1	0	1	1	0	0	0	100	100	0	50	75	100	100	25	0	50	0	100	50	0	0	0	20.984	1	0	87.5	66.6667	2	2	0	0	83.3333	2	9	1	1	1	0	1	65.2778
30	1	40	4	146	48	0	0	0	0	0	1	2	100	75	0	25	50	75	25	0	25	25	75	75	25	0	25	50	25	50	25	22.5183	0	0	70.8333	87.5	2	2	2	0	54.1667	0	4	0	1	1	1	1	75
45	2	48	6	164	57	0	0	0	1	0	0	2	50	100	100	100	100	100	100	100	100	100	100	75	0	100	100	75	100	100	100	21.1927	1	0	75	95.8333	2	2	2	0	87.5	0	13	2	1	1	1	1	87.5
30	1	48	3	162	67	0	0	0	0	2	1	2	25	50	50	50	75	50	0	50	25	50	50	25	75	25	50	50	50	50	50	25.5296	0	0	83.3333	45.8333	2	2	0	0	87.5	0	3	0	1	1	0	1	73.6111
27	0	62	6	146	44	0	0	1	0	2	1	2	0	0	50	50	75	0	25	25	50	50	100	0	25	0	75	50	0	25	50	20.6418	0	1	48.6111	48.6111	0	0	0	0	37.5	2	2	0	0	1	0	0	44.9074
26	0	48	7	170	65	0	0	1	0	2	0	2	100	100	100	100	100	100	100	100	100	100	100	25	0	100	100	100	25	100	75	22.4913	0	1	83.3333	83.3333	2	2	2	1	87.5	0	4	0	1	1	1	1	84.7222
31	1	62	3	167	59	0	0	1	1	2	0	3	0	0	100	50	100	50	0	50	50	75	75	100	0	25	100	50	0	25	0	21.1553	1	0	91.6667	70.8333	2	2	2	0	83.3333	2	10	1	1	1	1	1	88.8889
26	0	60	8	162	55	0	0	0	0	2	0	1	0	75	0	25	100	25	0	50	75	50	0	0	75	50	0	0	100	0	100	20.9572	0	1	37.5	37.5	0	0	0	0	37.5	1	5	0	0	0	0	0	37.5
29	0	62	6	157	56	0	0	0	0	0	0	2	75	75	100	100	100	50	25	50	25	100	100	0	25	25	0	100	25	50	0	22.719	0	1	87.5	87.5	2	2	2	0	91.6667	2	4	0	1	1	1	1	88.8889
50	3	48	6	161	58	0	0	1	1	0	0	2	50	75	100	50	100	50	25	50	0	100	75	0	50	0	25	0	25	25	25	22.3757	1	1	87.5	91.6667	2	2	2	0	70.8333	0	8	1	1	1	1	1	83.3333
30	1	48	6	161	58	1	0	0	0	0	1	3	0	0	100	50	100	0	100	0	25	50	25	25	0	100	100	0	25	25	50	22.3757	1	0	75	41.6667	2	2	0	0	83.3333	0	9	1	1	1	0	1	66.6667
51	3	48	7	179	64	1	1	0	1	0	1	1	75	25	0	0	75	50	0	50	25	75	50	25	50	75	75	75	25	75	75	19.9744	1	1	66.6667	66.6667	0	1	1	0	37.5	0	11	2	0	1	1	1	56.9444
43	2	48	7	150	45	1	2	0	2	0	1	2	0	0	0	25	100	0	25	0	0	100	100	100	100	25	25	0	25	0	100	20	1	1	29.1667	29.1667	0	0	0	1	37.5	0	8	1	0	0	0	0	26.3889
32	1	58	6	152	50	1	0	0	1	2	0	2	0	0	75	0	0	0	50	0	50	0	0	0	100	0	0	0	0	0	0	21.6413	1	1	100	0	2	3	0	0	83.3333	1	9	1	1	1	0	1	61.1111
31	1	58	6	177	65	1	0	0	0	0	0	2	0	0	0	100	0	0	0	0	0	0	0	0	100	0	0	0	0	0	0	20.7476	0	0	0	0	2	0	0	0	87.5	1	7	1	1	0	0	0	29.1667
30	1	70	6	176	75	1	0	1	0	0	1	2	0	0	50	0	0	75	25	100	100	100	100	75	50	100	100	100	0	25	0	24.2123	1	0	54.1667	91.6667	2	1	2	0	87.5	2	8	1	1	1	1	1	79.1667
31	1	60	8	178	75	1	0	1	0	0	0	1	25	25	25	0	100	0	25	25	0	25	50	0	0	25	0	0	0	25	25	23.6713	1	0	12.5	12.5	0	0	0	0	29.1667	1	4	0	0	0	0	0	18.0556
30	1	60	6	167	63	1	0	1	0	0	0	2	100	100	100	25	100	100	0	100	25	100	100	0	0	25	75	100	75	50	25	22.5896	1	0	87.5	58.3333	2	2	1	0	66.6667	1	10	1	1	1	1	1	77.7778
32	1	72	8	170	70	0	0	0	1	0	0	1	25	25	25	0	100	25	50	25	75	100	75	75	50	25	25	75	100	100	75	24.2215	1	1	33.3333	66.6667	0	0	1	0	33.3333	2	8	1	0	0	0	0	44.4444
54	3	36	1	176	100	0	2	0	2	0	1	1	25	0	50	50	100	25	25	25	100	25	50	0	100	0	0	0	0	0	0	32.2831	2	0	0	0	0	0	0	0	0	0	4	0	0	0	0	0	0
56	3	60	6	152	50	0	1	1	1	0	0	2	100	50	100	0	0	75	100	50	0	100	0	25	100	0	0	0	25	0	25	21.6413	1	1	87.5	87.5	1	2	2	0	54.1667	1	10	1	1	1	1	1	76.3889
43	2	48	6	170	61	0	0	0	1	0	1	2	100	75	100	100	75	50	25	50	25	75	75	25	25	100	75	100	75	50	100	21.1073	2	0	75	87.5	2	2	2	0	79.1667	0	17	3	1	1	1	1	84.7222
56	3	62	6	177	65	0	0	0	1	0	0	2	75	100	75	50	100	0	50	100	50	100	100	25	25	100	100	0	0	50	25	20.7476	2	1	87.5	87.5	2	2	2	0	87.5	2	12	2	1	1	1	1	87.5
30	1	52	5	178	65	0	0	0	0	0	1	1	0	0	50	50	25	50	0	50	50	25	25	50	75	25	0	100	100	25	75	20.5151	0	0	62.5	41.6667	0	2	0	0	29.1667	1	10	1	0	1	0	1	54.1667
30	1	48	6	158	52	0	0	0	0	0	1	1	50	75	75	50	100	50	25	50	25	25	75	0	25	0	100	0	75	25	0	20.83	0	0	87.5	33.3333	2	2	0	0	66.6667	0	8	1	1	1	0	1	69.4444
28	0	42	4	160	66	0	0	1	0	0	0	2	0	25	0	25	100	0	25	0	75	50	100	0	75	50	75	100	0	50	50	25.7812	0	0	54.1667	41.6667	0	1	0	1	25	0	3	0	0	1	0	0	40.2778
30	1	48	7	153	48	0	0	0	0	0	0	2	75	100	100	25	100	0	0	25	25	75	100	0	100	0	100	50	25	75	100	20.5049	0	0	87.5	58.3333	1	2	1	1	66.6667	0	9	1	1	1	1	1	70.8333
30	1	50	5	170	79	0	0	0	1	0	0	2	0	100	0	25	100	25	25	0	0	75	25	0	25	100	75	75	0	0	75	27.3356	1	0	54.1667	45.8333	2	1	0	0	87.5	1	3	0	1	1	0	1	62.5
28	0	52	5	172	60	0	0	0	1	0	1	2	0	100	0	25	100	0	100	0	25	75	75	0	25	50	50	50	0	25	75	20.2812	2	0	41.6667	41.6667	0	0	0	0	37.5	1	4	0	0	0	0	0	40.2778
30	1	52	5	152	52	0	0	0	0	0	0	2	25	100	50	25	75	25	75	100	100	100	100	25	75	100	25	25	100	25	75	22.5069	1	0	66.6667	58.3333	0	2	1	0	37.5	1	10	1	0	1	1	1	59.7222
42	2	48	6	164	70	0	1	1	1	0	1	2	0	25	0	0	0	0	50	0	75	0	0	50	100	0	25	0	50	100	25	26.0262	1	0	91.6667	75	2	2	0	0	62.5	0	14	2	1	1	0	1	70.8333
42	2	72	3	165	60	0	0	0	0	0	1	2	25	50	75	25	0	0	0	25	0	0	50	100	0	0	0	50	25	0	0	22.0386	1	0	87.5	91.6667	2	2	2	0	70.8333	2	8	1	1	1	1	1	90.2778
31	1	48	3	155	50	0	0	0	1	0	1	2	0	0	25	0	50	0	50	0	0	0	25	0	0	25	25	0	100	100	50	20.8117	1	0	87.5	91.6667	2	2	2	0	66.6667	0	6	1	1	1	1	1	90.2778
31	1	48	3	159	60	0	0	1	0	0	0	2	0	0	0	0	0	50	0	0	0	0	0	50	100	0	50	0	0	0	75	23.7332	1	0	20.8333	100	2	0	3	0	87.5	0	4	0	1	0	0	1	69.4444
51	3	72	8	177	78	0	1	1	2	0	1	3	0	25	0	100	0	75	0	0	50	0	0	75	50	50	50	25	50	100	100	24.8971	1	0	62.5	83.3333	2	1	2	0	91.6667	2	12	2	1	1	1	1	79.1667
26	0	48	7	170	70	0	0	0	0	0	1	3	0	50	0	100	0	0	0	0	50	50	100	75	75	75	75	0	25	100	100	24.2215	0	0	62.5	62.5	2	1	1	0	87.5	0	3	0	1	1	1	1	72.2222
31	1	52	5	171	60	0	1	0	1	0	0	2	75	0	25	50	100	50	100	25	50	50	100	75	75	25	50	0	0	25	75	20.5191	2	0	29.1667	29.1667	0	0	0	0	45.8333	1	1	0	0	0	0	0	33.3333
29	0	48	3	165	54	0	0	0	0	0	0	1	25	100	0	0	75	25	75	25	50	25	0	25	100	50	25	25	25	25	75	19.8347	0	0	37.5	37.5	0	0	0	0	37.5	0	5	0	0	0	0	0	37.5
26	0	72	8	160	57	0	0	0	0	0	0	2	100	75	25	100	100	75	25	0	25	100	100	0	50	0	50	50	25	100	50	22.2656	0	0	45.8333	45.8333	2	0	0	0	79.1667	2	3	0	1	0	0	1	56.9444
39	1	48	8	167	59	0	0	0	1	0	0	2	100	75	25	100	100	75	25	0	100	100	100	0	50	0	25	25	25	100	50	21.1553	1	0	48.6111	41.6667	0	0	0	0	37.5	0	4	0	0	0	0	0	42.5926
28	0	48	6	170	70	0	0	1	0	0	1	3	100	100	100	100	100	100	25	100	100	100	25	100	0	0	100	100	100	100	0	24.2215	0	0	66.6667	87.5	2	1	2	0	87.5	0	4	0	1	1	1	1	80.5556
30	1	48	5	151	52	0	0	0	1	0	1	2	0	0	25	25	100	50	0	50	50	100	100	25	75	0	50	75	50	50	75	22.806	1	0	45.8333	37.5	0	0	0	0	33.3333	0	4	0	0	1	0	0	38.8889
29	0	52	5	170	65	0	0	1	0	0	1	1	100	100	100	75	100	75	75	100	75	75	75	75	25	75	75	75	75	75	75	22.4913	0	0	75	75	2	2	2	0	87.5	1	3	0	1	1	1	1	80.5556
26	0	50	5	170	65	0	0	1	0	0	1	1	75	75	75	75	75	75	75	75	75	75	75	75	25	75	75	75	75	75	75	22.4913	0	0	79.1667	100	3	3	3	0	79.1667	1	7	1	1	1	1	1	100
30	1	48	7	170	80	1	0	0	0	2	0	3	0	25	25	25	50	75	25	100	25	100	100	0	0	100	25	100	25	100	100	27.6817	0	0	75	75	2	2	2	0	87.5	0	10	1	1	1	1	1	79.1667
27	0	48	3	176	65	0	0	0	0	2	1	1	0	0	0	0	0	25	0	0	0	0	75	50	100	0	0	0	0	0	0	20.984	0	0	0	0	0	0	0	0	16.6667	0	4	0	0	0	0	0	1.38889
42	2	60	6	172	68	0	0	1	1	0	1	3	100	25	100	50	50	25	75	75	0	25	0	0	75	50	75	75	0	0	0	22.9854	1	0	87.5	75	2	2	2	0	62.5	1	8	1	1	1	1	1	87.5
27	0	42	4	167	60	0	0	0	0	0	0	1	0	25	25	25	50	0	0	50	25	25	0	50	75	0	25	25	25	25	25	21.5139	0	0	20.8333	20.8333	0	0	0	0	20.8333	0	4	0	0	0	0	0	20.8333
40	2	62	6	160	72	0	0	0	0	0	0	2	75	75	100	100	100	75	50	100	100	25	100	100	25	100	75	100	75	75	100	28.125	1	0	87.5	75	2	2	2	0	66.6667	2	11	2	1	1	1	1	87.5
53	3	60	8	160	54	0	1	0	1	0	0	1	50	0	75	0	100	100	25	100	0	25	100	25	0	25	0	0	0	25	75	21.0937	1	0	20.8333	100	2	0	3	0	87.5	1	11	2	1	0	0	1	69.4444
40	2	40	4	177	72	0	1	0	1	2	0	1	25	25	25	0	25	25	0	25	0	25	25	25	75	25	25	25	25	25	25	22.9819	1	0	25	25	0	0	0	0	20.8333	0	7	1	0	0	0	0	23.6111
43	2	40	4	171	60	0	0	0	1	0	0	2	50	25	100	0	50	75	50	100	75	25	100	50	50	0	75	50	25	25	25	20.5191	1	0	66.6667	83.3333	0	2	2	1	37.5	0	10	1	0	1	1	1	68.0556
30	1	52	5	124	45	0	1	0	2	0	1	1	25	25	25	100	100	0	25	25	75	100	0	50	50	0	50	100	25	25	75	29.2664	2	0	75	91.6667	2	2	2	1	87.5	1	3	0	1	1	1	1	84.7222
43	2	48	8	165	54	0	0	0	1	0	0	1	0	0	0	0	100	25	0	0	25	25	25	50	75	25	25	25	0	25	25	19.8347	1	0	20.8333	20.8333	0	0	0	0	20.8333	0	13	2	0	0	0	0	20.8333
28	0	70	6	161	68	0	0	1	0	0	0	2	50	50	100	50	100	100	0	75	50	100	100	50	25	100	100	75	100	75	100	26.2336	0	0	66.6667	91.6667	2	2	2	0	66.6667	2	8	1	1	1	1	1	86.1111
42	2	40	4	167	90	1	1	0	1	0	0	1	50	25	75	75	100	50	0	25	50	50	50	0	50	0	100	25	50	25	50	32.2708	1	0	87.5	75	1	2	2	0	62.5	0	10	1	1	1	1	1	79.1667
29	0	52	7	172	60	0	0	0	0	0	1	1	0	0	0	100	0	0	0	0	0	0	0	0	100	0	0	0	0	0	0	20.2812	0	0	79.1667	66.6667	2	2	2	1	66.6667	1	7	1	1	1	1	1	90.2778
43	2	48	8	157	50	0	0	0	0	0	1	0	0	0	0	25	100	0	25	0	25	100	100	100	100	25	50	100	0	75	50	20.2848	1	0	20.8333	20.8333	0	0	0	1	20.8333	0	12	2	0	0	0	0	20.8333
28	0	48	8	180	64	0	0	1	0	0	0	0	100	100	100	100	100	100	100	100	100	100	100	100	0	100	100	100	100	100	100	19.7531	0	0	83.3333	100	3	3	3	0	83.3333	0	6	1	1	1	1	1	100
42	2	72	8	158	52	0	0	1	1	0	1	1	50	25	50	50	100	25	0	50	25	100	75	100	100	0	100	0	0	25	100	20.83	1	1	83.3333	37.5	2	2	0	0	87.5	2	9	1	1	1	0	1	69.4444
51	3	58	8	180	64	0	2	0	1	0	1	2	0	0	25	100	100	100	75	0	0	0	50	100	100	0	25	50	25	75	100	19.7531	2	1	83.3333	83.3333	2	2	2	0	87.5	1	20	3	1	1	1	1	84.7222
28	0	48	8	176	78	0	0	0	0	0	1	2	100	0	0	50	75	25	0	0	0	25	25	0	0	0	100	25	0	25	75	25.1808	0	0	37.5	87.5	2	0	2	0	79.1667	0	4	0	1	0	0	1	69.4444
31	1	72	6	178	65	0	0	0	1	0	0	1	25	100	50	0	100	25	0	0	25	25	25	25	0	25	25	0	50	25	100	20.5151	1	0	70.8333	37.5	0	2	0	0	45.8333	2	5	0	0	1	0	1	54.1667
30	1	42	4	160	75	0	0	1	0	0	1	1	0	75	0	50	100	0	50	25	50	50	0	50	25	0	100	100	100	25	50	29.2969	1	1	62.5	62.5	0	1	1	0	37.5	0	3	0	0	1	1	1	54.1667
28	0	70	3	168	58	0	0	1	0	0	1	1	0	25	100	25	100	25	0	0	0	0	25	0	75	25	25	0	0	0	25	20.5499	0	1	12.5	12.5	2	0	0	0	87.5	2	4	0	1	0	0	0	37.5
56	3	58	6	154	55	0	1	1	1	0	1	1	0	0	25	0	100	0	25	0	0	25	100	0	100	0	0	100	0	50	25	23.1911	2	1	79.1667	87.5	2	2	2	0	87.5	1	18	3	1	1	1	1	84.7222
42	2	70	8	158	52	0	0	0	2	0	1	2	0	50	0	25	100	25	25	50	50	100	50	25	75	50	50	0	25	25	25	20.83	2	1	29.1667	29.1667	0	0	0	1	45.8333	2	12	2	0	0	0	0	30.5556
43	2	48	6	157	67	0	0	0	1	0	0	1	50	0	50	25	25	50	100	50	0	25	50	0	100	25	100	0	0	100	100	27.1816	1	0	54.1667	41.6667	0	1	0	0	33.3333	0	12	2	0	1	0	0	43.0556
45	2	48	6	170	64	0	0	1	1	0	1	1	25	25	0	25	50	0	25	25	0	25	25	25	100	0	0	75	50	25	25	22.1453	1	0	87.5	75	2	2	2	0	66.6667	0	11	2	1	1	1	1	87.5
29	0	40	4	167	62	0	0	0	0	0	0	1	0	0	50	0	100	100	0	0	25	25	0	50	75	25	50	100	25	100	25	22.231	0	1	100	91.6667	2	3	2	0	87.5	0	4	0	1	1	1	1	93.0556
31	1	62	5	154	59	0	0	0	1	0	1	1	25	25	50	75	100	25	75	25	75	75	50	50	50	75	25	0	100	25	75	24.8777	1	1	83.3333	41.6667	0	2	0	0	37.5	2	10	1	0	1	0	1	54.1667
54	3	70	8	165	60	0	1	0	1	0	0	1	0	0	100	25	100	0	25	75	75	100	100	25	75	100	75	50	75	100	100	22.0386	1	1	37.5	37.5	0	0	0	0	37.5	2	12	2	0	0	0	0	37.5
40	2	60	8	158	80	0	0	0	1	0	1	2	50	50	75	25	75	50	50	75	75	100	75	0	50	100	75	75	75	75	100	32.0461	1	1	83.3333	87.5	3	2	2	0	100	1	8	1	1	1	1	1	90.2778
40	2	72	3	170	60	0	0	0	2	0	0	2	75	75	100	100	100	100	75	100	75	100	100	0	0	75	50	100	0	25	75	20.7612	1	1	54.1667	45.8333	2	1	0	0	91.6667	2	1	0	1	1	0	1	63.8889
36	1	42	4	143	46	0	0	1	1	0	1	1	50	50	100	75	100	100	25	50	75	75	100	100	25	75	75	75	0	25	25	22.495	1	1	91.6667	45.8333	2	2	0	0	83.3333	0	9	1	1	1	0	1	72.2222
31	1	48	6	156	58	0	0	0	0	0	1	1	75	50	25	0	50	0	0	50	0	0	0	100	100	0	100	0	100	0	100	23.833	1	1	83.3333	37.5	0	2	0	0	33.3333	0	6	1	0	1	0	1	51.3889
43	2	48	8	126	45	0	0	0	0	0	0	2	75	100	100	75	100	100	50	75	75	100	100	25	25	75	75	75	0	25	25	28.3447	1	1	45.8333	45.8333	2	0	0	0	91.6667	0	12	2	1	0	0	1	61.1111
55	3	36	1	154	60	0	1	0	1	0	0	1	0	75	25	75	50	50	75	50	50	75	75	50	50	50	75	100	50	50	50	25.2994	2	1	0	0	0	0	0	0	0	0	10	1	0	0	0	0	0
28	0	42	4	165	60	0	0	0	0	2	1	1	50	25	25	75	25	25	50	25	75	25	75	50	0	25	25	50	50	25	50	22.0386	0	1	37.5	37.5	0	0	0	0	37.5	0	4	0	0	0	0	0	37.5
30	1	40	4	160	60	0	0	0	0	0	0	1	0	25	25	25	25	25	25	50	25	25	25	0	100	25	25	25	25	25	25	23.4375	1	1	25	25	0	0	0	0	41.6667	0	4	0	0	0	0	0	23.6111
32	1	52	7	161	68	0	0	0	2	0	1	2	50	50	0	75	50	75	0	50	0	25	50	0	50	0	25	75	0	0	0	26.2336	1	0	16.6667	16.6667	0	0	0	0	37.5	1	5	0	0	0	0	0	23.6111
50	3	58	7	176	66	0	1	1	1	0	0	1	0	50	25	25	50	50	75	50	0	100	0	25	100	0	100	0	0	0	0	21.3068	2	0	87.5	87.5	0	2	2	1	33.3333	1	14	2	0	1	1	1	69.4444
26	0	72	8	167	58	0	0	0	0	0	1	2	0	25	25	50	0	0	25	0	0	0	25	0	100	0	0	0	0	0	75	20.7967	0	0	12.5	12.5	0	0	0	0	16.6667	2	4	0	0	0	0	0	13.8889
31	1	40	4	166	71	1	0	0	0	0	1	2	25	25	25	25	100	100	25	25	25	100	50	0	75	0	25	100	25	25	50	25.7657	0	1	87.5	83.3333	0	2	2	0	37.5	0	7	1	0	1	1	1	69.4444
42	2	40	4	156	53	0	1	0	0	0	0	1	75	75	75	0	75	75	0	75	25	75	75	0	25	0	25	75	25	0	25	21.7784	1	1	87.5	91.6667	1	2	2	1	62.5	0	8	1	1	1	1	1	80.5556
26	0	52	5	152	50	1	1	1	1	0	0	2	25	100	25	50	100	100	75	75	100	75	25	0	75	100	0	75	0	50	75	21.6413	1	1	47.2222	41.6667	1	0	0	1	83.3333	1	3	0	1	1	0	1	51.8519
27	0	52	5	160	85	0	0	1	0	0	1	2	50	25	50	100	100	75	100	50	25	50	100	25	50	50	100	50	25	75	50	33.2031	0	0	58.3333	45.8333	1	1	0	0	66.6667	1	3	0	1	1	0	1	56.9444
52	3	50	1	155	48	0	0	0	1	0	0	1	50	25	100	50	100	50	25	0	50	25	50	0	50	25	50	50	25	50	50	19.9792	1	1	87.5	91.6667	2	2	2	0	83.3333	1	19	3	1	1	1	1	86.1111
42	2	36	1	167	58	0	0	1	0	0	0	1	25	25	0	50	75	50	0	25	0	0	25	25	75	0	50	50	50	25	25	20.7967	0	1	33.3333	33.3333	0	0	0	0	37.5	0	13	2	0	0	0	0	34.7222
43	2	36	1	171	84	1	0	0	0	0	0	2	25	0	25	50	100	50	0	50	100	25	50	50	100	25	50	0	25	0	50	28.7268	0	0	25	25	0	0	0	0	45.8333	0	2	0	0	0	0	0	30.5556
26	0	52	5	150	59	0	0	1	0	0	0	2	25	0	50	0	100	75	0	25	0	100	100	0	100	0	50	0	100	0	75	26.2222	0	1	37.5	37.5	2	0	0	0	83.3333	1	4	0	1	0	0	1	52.7778
52	3	32	1	162	78	0	0	0	0	0	1	0	0	25	25	25	100	50	25	0	0	0	100	25	50	0	25	0	0	25	100	29.7211	1	1	25	25	0	0	0	0	37.5	0	11	2	0	0	0	0	29.1667
27	0	30	2	180	90	1	0	1	0	0	1	1	0	100	100	100	100	100	100	100	100	100	100	100	0	100	100	100	100	75	100	27.7778	0	0	62.5	75	2	2	2	1	66.6667	0	8	1	1	1	1	1	91.6667
30	1	62	2	155	69	1	0	0	0	0	1	1	25	0	50	0	100	75	25	75	25	100	100	0	25	75	100	100	100	25	100	28.7201	1	1	83.3333	83.3333	0	2	2	0	41.6667	2	7	1	0	1	1	1	69.4444
41	2	32	1	167	64	1	0	1	0	0	1	1	0	0	50	25	100	25	25	25	25	25	25	50	75	25	0	25	25	25	50	22.9481	0	0	25	25	0	0	0	0	33.3333	0	4	0	0	0	0	0	27.7778
42	2	32	1	165	80	0	0	0	1	0	1	1	25	25	25	100	100	50	100	25	0	0	50	0	50	25	50	50	25	0	25	29.3848	1	1	0	0	0	0	0	0	0	0	7	1	0	0	0	0	0
41	2	30	1	176	70	1	1	0	1	0	1	1	25	100	25	0	50	50	0	0	0	100	0	0	100	0	25	0	75	25	25	22.5981	2	0	25	25	0	0	0	0	45.8333	0	21	3	0	0	0	0	30.5556
55	3	30	1	173	76	0	1	0	1	0	0	2	75	25	100	25	50	50	0	50	0	100	100	0	50	50	50	50	0	50	0	25.3934	2	0	0	0	0	0	0	0	0	0	20	3	0	0	0	0	0
30	1	72	3	174	70	1	0	1	0	0	1	2	50	50	50	75	100	25	50	25	25	100	100	0	75	100	50	25	50	75	0	23.1206	1	0	91.6667	70.8333	2	2	2	1	83.3333	2	10	1	1	1	1	1	88.8889
32	1	42	4	182	87	0	0	1	1	0	0	2	0	50	75	0	50	50	50	75	0	0	25	0	25	25	75	100	0	25	25	26.2649	1	0	41.6667	41.6667	0	0	0	0	37.5	0	4	0	0	0	0	0	40.2778
31	1	48	3	152	58	1	0	0	1	0	0	1	75	100	50	75	75	50	0	100	75	0	100	25	25	0	100	100	0	0	0	25.1039	1	1	87.5	87.5	2	2	2	0	87.5	0	3	0	1	1	1	1	87.5
45	2	40	4	167	59	1	0	1	1	0	1	3	100	100	100	50	100	100	75	50	25	50	100	25	0	25	50	100	25	25	50	21.1553	2	0	70.8333	100	3	3	3	0	83.3333	0	12	2	1	1	1	1	100
30	1	40	4	172	75	0	1	0	1	0	1	2	0	0	100	50	100	50	0	0	0	75	0	25	100	0	0	0	50	50	25	25.3515	0	1	83.3333	83.3333	0	2	2	0	37.5	0	4	0	0	1	1	1	68.0556
27	0	48	8	165	62	0	0	0	0	0	0	1	0	0	0	50	100	50	25	25	50	50	75	50	75	50	25	50	50	50	50	22.7732	0	1	45.8333	45.8333	0	0	0	0	33.3333	0	3	0	0	0	0	0	41.6667
34	1	40	4	165	58	0	0	1	1	0	1	0	50	0	50	50	50	0	50	50	25	25	25	25	50	0	25	50	25	50	25	21.3039	1	1	29.1667	29.1667	0	0	0	0	37.5	0	8	1	0	0	0	0	30.5556
31	1	60	3	160	58	1	0	0	0	0	0	2	0	0	100	25	100	0	25	0	50	100	100	0	75	0	0	0	0	0	0	22.6562	0	1	0	0	0	0	0	0	37.5	1	9	1	0	0	0	0	12.5
30	1	48	3	147	59	1	0	0	0	0	1	0	0	0	75	25	50	0	25	25	0	0	0	0	75	50	75	75	25	25	0	27.3034	0	1	41.6667	41.6667	0	0	0	0	25	0	4	0	0	0	0	0	36.1111
42	2	62	3	167	70	0	0	0	1	0	1	2	75	75	75	75	75	75	50	75	25	50	75	0	25	75	50	75	0	0	0	25.0995	2	0	87.5	66.6667	2	2	2	0	87.5	2	9	1	1	1	1	1	87.5
56	3	32	1	172	70	0	1	1	1	0	0	1	25	25	75	75	75	75	75	75	25	75	75	0	25	75	75	75	25	25	25	23.6614	2	0	0	0	0	0	0	0	0	0	10	1	0	0	0	0	0
56	3	32	1	154	55	0	1	0	1	0	0	2	75	25	25	0	100	75	0	75	25	75	75	75	25	75	75	75	50	75	75	23.1911	1	1	0	0	0	0	0	0	37.5	0	15	2	0	0	0	0	12.5
57	3	36	1	157	64	0	0	1	1	0	1	2	75	75	75	50	100	75	25	75	0	75	75	0	25	0	100	75	25	0	75	25.9645	2	0	66.6667	100	3	3	3	0	66.6667	0	8	1	1	1	1	1	100
45	2	30	1	162	60	0	1	0	1	0	1	1	75	0	50	50	50	75	25	75	50	25	100	0	25	25	25	100	50	25	25	22.8624	2	1	0	0	0	0	0	0	0	0	9	1	0	0	0	0	0
43	2	36	1	167	68	0	2	1	1	0	1	2	0	0	0	25	25	0	0	0	25	25	25	25	100	0	0	0	0	0	0	24.3824	2	1	0	0	0	0	0	0	0	0	15	2	0	0	0	0	0
45	2	48	1	175	93	0	1	0	1	0	1	2	25	0	0	0	0	25	0	0	0	25	25	0	100	0	25	0	0	0	0	30.3673	2	0	0	0	0	0	0	0	0	0	20	3	0	0	0	0	0
51	3	36	1	153	72	0	1	0	1	0	1	0	0	0	25	25	100	100	25	0	50	75	100	75	75	0	100	100	100	0	100	30.7574	1	1	87.5	91.6667	2	2	2	0	83.3333	0	9	1	1	1	1	1	87.5
43	2	72	3	156	69	1	0	0	1	0	1	2	25	0	50	0	75	75	25	25	0	0	0	0	75	0	25	0	0	25	0	28.3531	1	1	87.5	87.5	2	2	2	1	87.5	2	7	1	1	1	1	1	87.5
32	1	48	3	162	64	0	0	0	1	0	0	1	25	0	50	100	100	50	100	0	0	100	75	100	100	100	50	25	100	100	0	24.3865	1	1	62.5	62.5	0	1	1	0	45.8333	0	9	1	0	1	1	1	56.9444
30	1	52	5	160	54	0	0	0	0	2	1	1	25	25	25	50	100	50	75	50	0	100	100	0	0	0	100	25	0	0	75	21.0937	1	1	48.6111	48.6111	0	0	0	0	37.5	1	4	0	0	0	0	0	44.9074
29	0	50	5	168	61	0	1	1	1	0	1	2	0	0	0	25	100	0	0	0	0	50	0	0	100	100	0	0	0	0	75	21.6128	2	0	29.1667	29.1667	0	0	0	0	20.8333	1	4	0	0	0	0	0	26.3889
56	3	48	6	164	55	0	0	0	1	0	0	1	0	50	50	0	25	75	0	0	100	0	100	50	100	0	100	100	0	50	100	20.4491	2	0	87.5	87.5	0	2	2	0	33.3333	0	13	2	0	1	1	1	69.4444
50	3	52	3	152	58	0	1	0	1	0	1	1	0	0	0	50	100	0	75	50	25	100	75	0	100	25	50	0	25	0	0	25.1039	1	1	87.5	83.3333	2	2	2	0	91.6667	1	20	3	1	1	1	1	87.5
29	0	48	5	155	55	1	0	0	0	0	0	1	0	0	0	0	25	0	0	50	50	100	25	100	100	25	100	100	50	100	75	22.8928	0	1	100	100	2	3	3	1	100	0	3	0	1	1	1	1	100
29	0	48	7	155	55	0	1	1	0	0	0	2	50	75	0	25	75	50	50	25	50	25	0	100	50	0	25	50	100	25	0	22.8928	0	1	33.3333	33.3333	0	0	0	0	45.8333	0	3	0	0	0	0	0	37.5
31	1	70	3	125	66	0	0	0	1	0	0	2	50	0	25	50	50	25	0	0	25	75	50	50	100	25	50	75	0	25	0	42.24	1	1	91.6667	87.5	2	2	2	0	87.5	2	4	0	1	1	1	1	88.8889
44	2	32	1	160	66	0	1	1	0	0	1	3	25	100	100	0	75	75	0	75	0	25	75	50	25	0	25	25	50	25	75	25.7812	1	1	0	0	0	0	0	0	0	0	15	2	0	0	0	0	0
56	3	32	1	167	72	0	1	1	2	0	0	3	100	25	100	75	75	75	0	75	0	100	100	0	25	0	75	100	0	0	25	25.8166	1	0	0	0	0	0	0	1	0	0	17	3	0	0	0	0	0
31	1	50	5	153	58	1	0	1	1	0	0	1	0	0	0	75	50	0	0	0	0	0	50	0	75	0	100	25	75	75	75	24.7768	1	1	58.3333	58.3333	2	1	1	0	87.5	1	5	0	1	1	1	1	68.0556
26	0	48	8	172	72	1	0	0	0	0	0	1	100	100	100	75	100	100	100	100	100	100	100	100	0	75	25	0	50	50	50	24.3375	0	0	41.6667	41.6667	2	0	0	0	75	0	3	0	1	0	0	1	52.7778
26	0	52	5	120	56	1	0	0	1	0	1	2	50	25	25	25	100	25	25	0	50	75	50	25	75	50	100	25	100	75	75	38.8889	1	1	70.8333	70.8333	2	1	1	0	91.6667	1	6	1	1	1	1	1	77.7778
40	2	40	4	140	77	0	0	0	1	2	0	1	25	0	25	25	75	50	0	25	0	50	50	50	75	75	50	75	50	25	50	39.2857	1	0	54.1667	41.6667	0	1	0	0	33.3333	0	9	1	0	1	0	0	43.0556
39	1	48	8	152	52	0	2	1	1	0	0	2	75	75	0	25	100	100	25	100	0	100	100	100	50	50	25	100	25	50	25	22.5069	1	1	83.3333	45.8333	1	2	0	0	62.5	0	11	2	1	1	0	1	63.8889
30	1	48	7	153	48	0	0	0	0	0	0	2	0	0	50	50	0	0	100	0	0	75	0	100	100	0	50	25	0	0	100	20.5049	0	1	29.1667	29.1667	0	0	0	0	33.3333	0	10	1	0	0	0	0	25
57	3	48	8	152	52	0	0	1	1	0	0	2	100	50	100	75	50	0	50	50	100	0	100	50	0	0	100	100	0	100	50	22.5069	1	1	83.3333	58.3333	1	2	1	0	62.5	0	11	2	1	1	1	1	68.0556
31	1	40	4	146	44	0	0	0	1	0	0	1	50	100	75	50	50	75	25	75	0	75	50	0	50	0	25	0	0	75	25	20.6418	1	1	100	100	3	3	3	1	87.5	0	8	1	1	1	1	1	95.8333
26	0	48	3	155	50	0	0	0	0	0	0	2	0	0	0	0	100	75	0	0	50	100	0	0	100	50	0	0	0	0	0	20.8117	0	1	8.33333	8.33333	0	0	0	0	45.8333	0	3	0	0	0	0	0	15.2778
54	3	58	6	158	50	0	0	0	0	0	0	2	0	25	0	0	50	0	25	50	25	25	100	100	75	50	75	75	25	100	100	20.0288	2	1	100	100	3	3	3	0	100	1	15	2	1	1	1	1	100
45	2	48	7	168	61	0	1	1	1	0	0	1	25	0	0	50	100	25	25	25	0	50	25	0	25	0	100	100	0	0	100	21.6128	1	1	45.8333	37.5	0	0	0	1	33.3333	0	9	1	0	1	0	0	38.8889
28	0	60	6	155	50	0	0	0	0	0	0	2	0	0	0	0	100	0	25	0	50	100	25	0	100	50	100	100	0	0	0	20.8117	0	1	41.6667	87.5	2	0	2	0	87.5	1	2	0	1	0	0	1	72.2222
37	1	42	4	121	45	0	1	1	1	0	1	2	50	75	50	50	75	50	75	25	50	0	50	0	100	25	75	50	25	50	50	30.7356	1	1	87.5	87.5	1	2	2	0	58.3333	0	12	2	1	1	1	1	77.7778
51	3	72	6	155	55	0	1	1	1	0	1	2	0	50	50	100	100	100	0	25	0	75	0	0	100	0	75	50	0	100	0	22.8928	2	1	37.5	37.5	2	0	0	0	87.5	2	12	2	1	0	0	1	54.1667
30	1	70	6	160	75	0	0	0	0	0	1	3	0	25	50	75	100	75	50	25	75	75	25	50	25	0	0	75	0	50	50	29.2969	1	1	29.1667	29.1667	0	0	0	0	41.6667	2	4	0	0	0	0	0	33.3333
57	3	30	1	160	58	0	1	1	1	0	0	2	25	50	75	25	75	75	0	75	0	50	50	25	25	25	75	75	0	0	25	22.6562	2	0	0	0	0	0	0	0	0	0	21	3	0	0	0	0	0
45	2	62	3	182	105	0	0	0	1	0	1	2	25	0	100	50	100	100	25	100	50	100	50	25	0	0	100	100	100	25	0	31.6991	2	0	54.1667	41.6667	1	1	0	0	62.5	2	8	1	1	1	0	1	52.7778
30	1	50	5	167	60	0	0	0	0	2	0	2	75	100	100	50	100	100	75	100	50	75	100	100	0	100	25	100	50	25	75	21.5139	1	0	62.5	62.5	2	1	1	0	87.5	1	8	1	1	1	1	1	70.8333
42	2	48	7	170	65	0	1	0	1	0	0	1	50	25	0	25	25	75	75	100	25	50	100	0	0	100	50	100	25	25	0	22.4913	2	1	45.8333	37.5	0	0	0	0	33.3333	0	15	2	0	1	0	0	38.8889
31	1	48	5	170	58	0	0	1	1	0	0	2	50	25	50	50	100	75	50	75	50	100	50	25	50	25	75	100	75	50	50	20.0692	1	1	62.5	62.5	1	1	1	0	58.3333	0	6	1	1	1	1	1	61.1111
31	1	48	6	152	48	0	0	0	1	0	0	2	25	25	25	25	100	100	100	25	100	100	0	25	75	100	100	100	100	100	100	20.7756	1	1	87.5	91.6667	0	2	2	0	41.6667	0	7	1	0	1	1	1	73.6111
30	1	40	4	160	59	0	0	1	0	0	0	2	0	50	0	0	100	100	0	100	100	100	100	50	0	100	0	100	50	25	25	23.0469	1	0	45.8333	83.3333	0	0	2	1	41.6667	0	2	0	0	1	0	1	56.9444
27	0	40	4	149	48	0	0	0	0	0	1	1	25	0	0	25	0	0	25	0	25	100	75	50	50	0	25	50	25	50	50	21.6206	0	1	33.3333	33.3333	0	0	0	1	33.3333	0	6	1	0	0	0	0	25
31	1	52	5	165	58	1	0	1	1	0	1	2	75	75	25	25	25	50	0	0	25	75	100	50	0	0	100	25	50	25	75	21.3039	1	0	45.8333	45.8333	2	0	0	0	87.5	1	9	1	1	0	0	1	59.7222
40	2	42	4	163	62	0	1	0	1	0	1	2	50	25	0	0	75	50	25	50	25	50	75	75	50	0	50	75	50	75	25	23.3355	1	1	45.8333	87.5	2	0	2	0	87.5	0	6	1	1	0	0	1	73.6111
42	2	70	3	149	48	0	1	1	1	0	0	1	0	0	0	0	50	75	75	50	100	100	50	0	100	0	0	25	50	0	0	21.6206	1	1	87.5	91.6667	2	2	2	1	91.6667	2	7	1	1	1	1	1	90.2778
30	1	70	8	147	52	0	0	0	0	2	0	2	0	25	100	0	100	100	25	75	25	50	100	0	100	50	75	25	25	25	25	24.064	0	1	37.5	37.5	2	0	0	0	87.5	2	3	0	1	0	0	1	54.1667
30	1	60	6	158	58	0	0	1	0	0	0	1	100	0	0	0	0	50	0	0	0	0	0	50	0	25	75	100	100	25	50	23.2335	1	1	47.2222	47.2222	0	0	0	0	47.2222	1	3	0	0	1	0	0	47.2222
40	2	72	3	171	65	0	1	1	1	0	1	2	50	0	50	100	75	75	0	0	0	100	100	25	50	0	100	100	25	100	0	22.2291	1	0	83.3333	66.6667	2	2	2	1	79.1667	2	10	1	1	1	1	1	88.8889
28	0	52	5	150	60	0	1	1	1	0	0	2	100	0	100	75	100	100	25	100	0	100	100	50	0	100	50	0	75	100	75	26.6667	1	1	87.5	100	2	2	3	1	91.6667	1	5	0	1	1	1	1	93.0556
54	3	48	8	150	47	0	1	1	1	0	0	1	0	25	50	0	0	25	100	50	100	100	75	25	50	100	75	50	0	25	100	20.8889	2	1	16.6667	16.6667	0	0	0	0	37.5	0	18	3	0	0	0	0	16.6667
31	1	52	5	155	48	0	0	1	0	0	1	2	75	50	0	100	100	100	75	75	25	50	25	0	25	50	50	25	50	0	75	19.9792	0	1	47.2222	47.2222	0	0	0	0	37.5	1	7	1	0	0	0	0	43.9815
43	2	72	6	168	85	0	0	1	0	2	0	2	75	75	75	50	100	75	100	75	0	100	100	50	25	25	100	100	0	100	25	30.1162	0	1	91.6667	58.3333	2	2	1	0	87.5	2	9	1	1	1	1	1	79.1667
33	1	60	3	160	72	0	1	0	1	0	0	2	75	25	100	25	100	75	0	50	100	25	0	50	0	0	25	100	0	100	0	28.125	1	1	91.6667	87.5	2	2	2	0	87.5	1	5	0	1	1	1	1	88.8889
43	2	70	8	167	60	0	0	0	0	0	0	2	25	0	50	75	100	50	50	0	50	50	100	0	100	50	0	50	100	50	100	21.5139	0	1	45.8333	45.8333	2	0	0	0	87.5	2	9	1	1	0	0	1	59.7222
26	0	48	8	167	58	0	0	0	0	0	0	2	25	0	50	0	100	50	50	0	50	50	100	0	100	50	0	50	100	50	100	20.7967	0	1	48.6111	48.6111	0	0	0	0	37.5	0	4	0	0	0	0	0	44.9074
26	0	72	6	167	60	0	0	1	0	0	0	3	100	75	100	100	100	100	25	100	25	100	100	50	0	0	100	100	50	0	0	21.5139	0	1	41.6667	87.5	2	0	2	1	83.3333	2	2	0	1	0	0	1	68.0556
28	0	52	5	162	56	0	0	0	2	0	0	2	75	75	100	75	100	75	50	100	100	75	75	100	25	25	0	75	0	25	75	21.3382	1	0	47.2222	47.2222	0	0	0	0	47.2222	1	3	0	0	0	0	0	47.2222
31	1	52	5	168	60	0	0	0	0	2	1	2	0	50	25	50	100	0	100	50	50	100	75	100	0	0	0	75	25	50	75	21.2585	1	1	37.5	37.5	0	0	0	1	37.5	1	9	1	0	0	0	0	37.5
42	2	70	6	146	48	0	0	0	0	0	0	2	25	0	0	75	100	25	25	25	50	25	50	0	50	50	25	50	50	25	50	22.5183	0	1	87.5	41.6667	0	2	0	0	37.5	2	6	1	0	1	0	1	55.5556
31	1	58	3	165	63	0	0	1	0	2	0	2	0	25	0	25	100	100	50	75	0	0	0	75	75	50	25	100	50	50	0	23.1405	1	1	91.6667	87.5	2	2	2	0	87.5	1	3	0	1	1	1	1	88.8889
27	0	52	5	167	60	0	0	1	0	0	1	3	100	75	100	100	100	100	0	100	100	100	100	75	0	25	100	100	25	25	75	21.5139	0	1	100	100	3	3	3	0	100	1	4	0	1	1	1	1	100
31	1	48	6	164	57	0	0	0	1	0	0	2	50	75	25	50	100	50	100	0	75	100	25	75	75	75	100	0	100	50	100	21.1927	1	1	70.8333	87.5	2	1	2	0	58.3333	0	5	0	1	1	1	1	72.2222
27	0	58	6	179	70	0	0	0	0	0	0	2	50	100	100	50	100	0	0	100	75	100	50	0	0	100	100	0	100	50	25	21.847	0	1	91.6667	62.5	2	2	1	0	87.5	1	4	0	1	1	1	1	80.5556
32	1	48	8	152	48	0	0	1	1	0	0	3	50	75	100	0	100	75	25	100	100	25	25	25	0	0	0	75	0	75	75	20.7756	1	1	83.3333	37.5	1	2	0	0	83.3333	0	6	1	1	1	0	1	62.5
28	0	50	5	167	75	0	0	1	0	0	1	2	25	0	25	25	50	0	25	100	0	0	50	25	0	75	100	50	0	100	50	26.8923	0	0	62.5	62.5	0	1	1	0	20.8333	1	3	0	0	1	1	0	48.6111
26	0	48	6	149	45	0	0	0	0	0	1	0	50	0	0	25	100	100	50	50	50	100	100	50	50	50	100	75	75	100	100	20.2694	0	1	83.3333	83.3333	2	2	2	0	87.5	0	3	0	1	1	1	1	84.7222
26	0	48	6	170	68	0	0	0	0	2	0	1	25	50	25	25	100	0	100	50	75	0	100	0	100	0	100	50	100	100	100	23.5294	0	1	75	75	2	2	2	0	83.3333	0	3	0	1	1	1	1	77.7778
27	0	62	6	160	58	1	0	1	0	0	0	1	25	100	100	25	100	50	0	0	25	100	100	100	100	50	100	0	100	50	100	22.6562	0	1	66.6667	83.3333	1	1	2	0	83.3333	2	4	0	1	1	1	1	72.2222
33	1	60	6	167	62	1	0	1	1	0	0	1	100	100	100	100	100	100	100	100	100	100	100	100	0	100	100	100	100	100	100	22.231	1	1	91.6667	91.6667	2	2	2	0	87.5	1	6	1	1	1	1	1	90.2778
51	3	62	8	165	60	1	0	0	0	0	1	2	75	75	75	25	25	75	50	50	0	25	0	0	100	0	100	0	0	25	25	22.0386	2	1	25	25	2	0	0	0	91.6667	2	12	2	1	0	0	0	47.2222
27	0	48	6	179	70	0	0	1	0	0	0	3	75	100	100	75	100	25	0	100	100	25	75	0	0	50	75	50	75	100	25	21.847	0	1	87.5	62.5	2	2	1	0	83.3333	0	4	0	1	1	1	1	77.7778
29	0	52	5	168	60	0	1	0	1	0	1	2	50	50	25	0	100	75	25	50	25	50	50	75	25	25	100	75	75	0	75	21.2585	1	1	58.3333	45.8333	0	1	0	0	41.6667	1	6	1	0	1	0	0	48.6111
39	1	40	4	153	51	0	0	1	1	0	0	1	50	25	75	25	50	25	50	50	25	50	50	0	50	75	75	50	75	50	50	21.7865	1	0	62.5	62.5	0	1	1	0	41.6667	0	10	1	0	1	1	1	55.5556
50	3	60	6	166	80	0	0	1	1	0	1	2	100	0	100	50	100	100	0	50	50	25	50	50	0	0	0	100	0	100	100	29.0318	2	1	47.2222	41.6667	2	0	0	0	83.3333	1	9	1	1	1	0	1	54.6296
42	2	42	4	153	63	0	0	0	1	2	0	1	25	0	0	25	100	0	75	0	25	50	75	75	50	50	25	100	50	0	50	26.9127	1	1	100	100	3	3	3	1	100	0	8	1	1	1	1	1	100
30	1	42	4	168	58	0	0	0	0	0	1	2	0	0	0	50	0	50	0	0	0	0	25	25	75	0	0	0	50	0	50	20.5499	1	1	91.6667	87.5	2	2	2	0	83.3333	0	10	1	1	1	1	1	87.5
56	3	48	3	163	59	0	2	0	1	0	1	2	100	100	100	100	100	75	100	100	50	25	100	0	0	75	100	100	0	0	0	22.2063	2	1	87.5	87.5	2	2	2	0	87.5	0	8	1	1	1	1	1	87.5
27	0	52	5	165	73	0	0	0	1	0	0	2	50	0	100	100	100	100	100	50	50	100	25	0	50	0	100	100	75	100	75	26.8136	1	1	87.5	91.6667	2	3	2	0	100	1	3	0	1	1	1	1	93.0556
44	2	60	6	154	51	0	0	0	0	0	0	2	75	25	75	100	50	50	25	75	25	100	75	50	25	25	75	75	75	25	50	21.5045	1	1	54.1667	45.8333	1	1	0	0	62.5	1	9	1	1	1	0	1	54.1667
45	2	62	6	157	50	0	0	0	1	0	0	2	75	25	75	100	50	50	50	75	0	100	75	75	25	25	75	75	50	25	50	20.2848	1	1	91.6667	41.6667	1	2	0	0	62.5	2	9	1	1	1	0	1	65.2778
28	0	50	5	152	49	0	0	0	0	0	1	1	0	25	25	75	100	50	0	0	0	100	25	50	50	0	100	100	50	25	75	21.2084	0	1	58.3333	58.3333	2	1	1	0	87.5	1	4	0	1	1	1	1	68.0556
30	1	52	3	185	80	0	0	1	0	0	1	2	50	50	75	25	100	50	0	50	0	50	75	25	25	75	75	100	0	50	0	23.3747	1	0	45.8333	41.6667	1	0	0	0	58.3333	1	3	0	1	1	0	0	48.6111
27	0	40	4	164	56	0	0	1	0	2	0	3	0	75	50	100	100	50	25	25	50	100	0	25	75	75	25	0	25	25	25	20.8209	0	1	87.5	87.5	1	2	2	0	62.5	0	4	0	1	1	1	1	79.1667
43	2	70	8	152	59	0	0	0	1	0	0	2	100	75	75	0	25	75	50	100	75	100	25	0	0	50	50	0	50	0	100	25.5367	1	1	83.3333	41.6667	2	2	0	0	87.5	2	8	1	1	1	0	1	70.8333
26	0	40	4	157	50	0	0	1	0	0	0	3	75	100	100	100	75	75	100	100	100	100	100	0	0	100	100	100	75	75	25	20.2848	0	1	79.1667	87.5	2	2	2	0	87.5	0	3	0	1	1	1	1	84.7222
42	2	48	6	165	60	0	1	1	1	2	0	2	0	50	100	50	75	75	100	75	25	25	75	25	0	75	25	100	100	25	100	22.0386	1	0	87.5	70.8333	1	2	2	0	58.3333	0	12	2	1	1	1	1	77.7778
30	1	40	4	164	55	0	0	1	0	0	0	2	75	75	100	75	75	75	50	50	75	50	75	25	75	50	75	50	50	50	50	20.4491	1	0	87.5	45.8333	2	2	0	0	79.1667	0	9	1	1	1	0	1	70.8333
26	0	40	4	164	56	0	0	1	0	2	1	3	0	0	0	0	25	25	0	0	0	25	25	25	75	25	25	25	0	25	50	20.8209	0	1	87.5	25	0	2	0	0	8.33333	0	3	0	0	1	0	0	40.2778
30	1	72	6	173	63	1	0	1	0	0	1	2	100	100	75	75	100	100	25	100	75	50	100	0	0	0	100	100	25	50	100	21.0498	0	0	62.5	83.3333	2	1	2	0	87.5	2	6	1	1	1	1	1	79.1667
30	1	48	6	173	60	1	0	0	0	0	0	2	75	50	25	50	100	25	50	50	25	75	50	25	75	75	75	0	50	25	100	20.0474	1	1	87.5	45.8333	1	2	0	0	54.1667	0	8	1	1	1	0	1	62.5
41	2	72	8	153	63	0	0	0	1	0	0	2	50	0	100	75	100	25	0	0	0	25	25	0	50	50	100	100	25	0	100	26.9127	1	1	83.3333	62.5	2	2	1	0	87.5	2	8	1	1	1	1	1	77.7778
26	0	48	6	137	50	0	0	1	0	2	0	2	0	100	100	100	25	0	25	100	50	100	0	100	0	100	100	100	100	75	100	26.6397	0	0	62.5	75	1	2	2	0	66.6667	0	4	0	1	1	1	1	81.9444
27	0	72	3	161	55	0	0	1	0	2	0	2	75	0	0	0	100	50	0	50	0	100	100	0	0	25	100	0	25	50	0	21.2183	0	1	33.3333	33.3333	0	0	0	0	33.3333	2	3	0	0	0	0	0	34.7222
30	1	72	6	155	64	0	0	1	0	0	0	2	25	25	0	50	100	25	0	25	0	100	0	0	100	0	0	25	25	25	100	26.6389	0	1	100	29.1667	2	3	0	0	83.3333	2	8	1	1	1	0	1	70.8333
31	1	62	6	165	57	0	0	0	1	0	0	1	100	100	100	100	100	100	100	100	100	100	100	100	0	100	100	100	100	100	100	20.9366	1	1	91.6667	91.6667	2	2	2	1	87.5	2	6	1	1	1	1	1	90.2778
29	0	52	5	167	62	1	0	1	0	0	1	2	50	75	100	75	100	100	75	75	75	100	0	0	0	50	100	100	0	75	75	22.231	1	0	66.6667	66.6667	2	1	1	0	87.5	1	5	0	1	1	1	1	75
31	1	52	5	163	63	0	0	1	0	0	1	3	100	100	100	75	100	100	50	100	50	50	50	50	0	75	100	100	25	25	75	23.7118	1	0	66.6667	66.6667	2	1	1	0	79.1667	1	9	1	1	1	1	1	72.2222
30	1	48	6	168	66	0	0	1	0	0	0	2	100	0	100	25	100	75	0	75	0	100	100	100	0	100	100	100	100	100	100	23.3844	1	0	87.5	75	1	2	2	0	66.6667	0	9	1	1	1	1	1	80.5556
32	1	52	5	152	68	0	0	0	1	2	1	2	25	50	25	75	50	0	25	50	25	25	50	100	50	50	50	25	50	25	75	29.4321	1	1	45.8333	45.8333	0	0	0	0	37.5	1	7	1	0	0	0	0	43.0556
31	1	48	7	158	60	0	0	1	0	2	0	2	0	0	75	0	75	75	75	50	75	75	50	25	0	50	75	50	100	75	75	24.0346	1	1	70.8333	70.8333	0	1	1	0	37.5	0	8	1	0	1	1	1	59.7222
30	1	42	4	165	85	0	0	1	0	0	1	2	25	50	75	0	75	0	50	25	0	0	100	25	50	0	75	0	0	25	25	31.2213	1	1	20.8333	20.8333	0	0	0	0	37.5	0	4	0	0	0	0	0	26.3889
57	3	48	8	170	65	1	1	1	1	0	0	2	100	100	100	25	100	100	100	100	100	100	100	0	0	100	100	100	100	100	100	22.4913	2	1	87.5	87.5	2	2	2	0	87.5	0	14	2	1	1	1	1	87.5
31	1	70	6	155	57	0	0	1	0	0	0	2	75	100	100	100	100	100	75	100	25	100	100	50	0	75	100	100	75	100	75	23.7253	1	1	87.5	87.5	2	2	2	0	83.3333	2	4	0	1	1	1	1	86.1111
28	0	72	6	164	60	0	0	1	0	0	1	2	100	100	100	100	100	100	100	100	100	100	100	100	0	100	100	100	100	100	100	22.3081	0	1	87.5	87.5	2	2	2	0	75	2	4	0	1	1	1	1	83.3333
30	1	72	6	161	60	0	0	0	0	0	0	2	100	100	100	100	100	100	75	100	100	100	100	0	0	100	100	100	0	100	100	23.1473	1	1	83.3333	83.3333	2	2	2	0	87.5	2	3	0	1	1	1	1	84.7222
30	1	48	3	164	55	0	0	1	0	0	1	1	50	50	50	50	50	50	50	50	50	50	0	0	75	50	50	50	50	50	0	20.4491	1	1	91.6667	87.5	2	2	2	0	87.5	0	7	1	1	1	1	1	88.8889
45	2	42	4	172	67	0	1	1	1	0	0	2	0	0	100	25	100	100	0	25	25	100	0	25	100	100	100	100	100	0	25	22.6474	1	0	75	87.5	1	2	2	1	70.8333	0	12	2	1	1	1	1	75
45	2	60	6	164	65	0	0	1	1	0	0	2	50	0	100	50	100	100	50	100	0	25	50	50	0	100	0	100	75	25	100	24.1672	1	1	87.5	87.5	1	2	2	1	66.6667	1	8	1	1	1	1	1	80.5556
26	0	72	3	157	50	0	1	0	1	0	1	2	100	100	75	0	100	100	50	50	50	0	75	0	0	75	50	100	100	100	0	20.2848	0	1	70.8333	70.8333	2	1	1	1	83.3333	2	4	0	1	1	1	1	73.6111
27	0	70	6	160	75	0	0	1	0	0	1	2	0	0	100	25	100	100	75	100	0	75	100	25	50	0	100	100	100	50	100	29.2969	0	1	75	75	1	2	2	0	54.1667	2	3	0	1	1	1	1	68.0556
40	2	48	3	179	64	0	0	1	1	0	0	0	100	0	0	50	0	0	0	0	100	0	0	0	75	50	75	75	50	0	0	19.9744	2	0	87.5	91.6667	2	2	2	0	79.1667	0	11	2	1	1	1	1	90.2778
40	2	70	3	172	65	0	0	0	0	0	0	3	100	100	100	75	100	100	75	100	25	100	100	0	0	100	100	100	25	50	0	21.9713	1	0	62.5	62.5	2	1	1	0	79.1667	2	10	1	1	1	1	1	69.4444
30	1	48	6	165	60	0	0	0	0	0	0	2	0	0	0	0	100	25	0	50	50	100	50	25	75	0	25	50	50	75	100	22.0386	0	1	45.8333	37.5	0	0	0	0	33.3333	0	4	0	0	1	0	0	34.7222
30	1	58	3	161	55	0	0	0	0	2	0	2	50	50	100	0	100	50	25	50	0	100	75	0	50	25	100	100	0	0	0	21.2183	1	1	87.5	87.5	2	2	2	0	83.3333	1	10	1	1	1	1	1	86.1111
31	1	70	8	152	56	0	0	0	0	0	0	2	0	0	25	0	0	25	25	0	25	0	0	0	100	0	25	0	25	0	75	24.2382	0	1	20.8333	20.8333	0	0	0	0	37.5	2	10	1	0	0	0	0	16.6667
29	0	60	6	155	63	1	0	1	0	2	1	2	25	50	75	50	50	75	100	100	100	75	100	0	0	100	100	75	75	100	100	26.2227	0	0	62.5	91.6667	1	2	2	1	62.5	1	2	0	1	1	1	1	79.1667
30	1	48	8	164	55	0	0	1	0	0	0	2	75	75	75	75	100	75	0	75	0	25	75	0	50	50	75	75	50	0	75	20.4491	0	1	54.1667	41.6667	2	1	0	1	83.3333	0	9	1	1	1	0	1	58.3333
30	1	52	7	165	54	0	0	1	0	0	1	1	50	50	75	100	100	0	25	0	0	0	75	25	75	0	25	0	0	0	0	19.8347	0	1	91.6667	91.6667	2	2	2	0	87.5	1	6	1	1	1	1	1	90.2778
31	1	72	8	182	68	0	0	1	1	2	1	2	100	75	100	25	100	100	50	100	75	100	75	50	25	75	100	100	75	50	50	20.5289	1	1	75	75	2	2	2	0	83.3333	2	10	1	1	1	1	1	77.7778
33	1	48	6	149	45	0	0	0	1	0	0	2	100	100	75	25	100	100	50	100	25	100	100	25	0	100	100	100	75	100	100	20.2694	1	1	95.8333	95.8333	2	2	2	0	83.3333	0	7	1	1	1	1	1	91.6667
31	1	48	5	176	68	0	0	0	2	0	1	1	50	75	100	50	100	100	25	25	50	50	50	75	25	50	50	75	50	75	75	21.9525	1	0	62.5	62.5	2	1	1	0	87.5	0	7	1	1	1	1	1	70.8333
31	1	60	3	156	60	0	0	0	0	2	1	2	0	0	0	50	75	0	0	0	25	50	0	0	100	100	25	50	0	0	0	24.6548	0	1	29.1667	29.1667	0	0	0	0	39.83	1	9	1	0	0	0	0	26.3889
31	1	62	3	152	48	0	0	1	1	0	0	2	75	75	100	25	100	100	25	75	25	100	75	25	25	50	25	100	50	50	0	20.7756	1	1	91.6667	87.5	2	2	2	1	87.5	2	3	0	1	1	1	1	88.8889
31	1	48	8	146	45	0	0	1	1	2	0	2	0	100	0	100	100	100	50	100	25	0	0	25	100	100	100	100	25	25	75	21.1109	1	1	87.5	87.5	1	2	2	0	66.6667	0	9	1	1	1	1	1	80.5556
32	1	60	8	153	48	0	0	0	0	0	0	1	25	50	0	0	100	75	25	0	25	100	25	0	75	25	25	25	50	100	25	20.5049	0	1	41.6667	41.6667	2	0	0	0	83.3333	1	8	1	1	0	0	1	55.5556
30	1	52	5	167	56	0	0	0	0	0	1	1	25	75	50	50	100	100	0	0	50	100	50	0	75	0	0	100	100	50	75	20.0796	0	1	54.1667	45.8333	2	1	0	0	87.5	1	2	0	1	1	0	1	62.5
26	0	50	5	165	54	1	2	1	1	0	0	2	100	50	75	50	50	50	50	75	75	50	75	75	25	75	75	75	75	75	75	19.8347	1	1	75	75	2	2	2	0	87.5	1	4	0	1	1	1	1	79.1667
56	3	48	8	175	67	0	1	1	2	0	0	3	100	0	100	25	100	100	25	100	25	100	100	25	0	75	100	100	0	100	75	21.8776	2	1	87.5	75	1	2	2	0	70.8333	0	15	2	1	1	1	1	77.7778
26	0	48	8	179	70	0	0	1	0	2	1	3	100	50	100	0	100	100	25	100	25	100	100	0	0	50	100	100	25	100	0	21.847	0	0	62.5	62.5	2	1	1	0	75	0	3	0	1	1	1	1	66.6667
43	2	32	2	150	50	0	1	0	1	0	1	2	75	50	0	50	50	0	50	50	50	75	75	0	100	0	50	50	50	50	75	22.2222	1	1	45.8333	45.8333	0	0	0	0	37.5	0	6	1	0	0	0	0	43.0556
52	3	70	6	164	55	0	1	1	1	0	1	2	50	100	0	50	100	100	75	100	0	50	50	75	0	0	0	100	0	25	25	20.4491	2	1	87.5	87.5	1	2	2	0	66.6667	2	14	2	1	1	1	1	80.5556
43	2	70	6	168	60	0	0	1	1	0	0	3	100	100	100	100	100	100	100	100	100	100	100	100	0	100	100	100	100	100	100	21.2585	1	1	87.5	87.5	2	2	2	0	75	2	8	1	1	1	1	1	83.3333
26	0	40	4	153	48	0	0	1	0	0	1	1	0	0	0	75	100	0	0	0	0	75	100	0	75	75	0	50	75	25	50	20.5049	0	1	45.8333	45.8333	0	0	0	0	29.1667	0	2	0	0	0	0	0	40.2778
45	2	62	2	160	68	0	0	0	0	0	0	1	75	50	25	25	100	50	25	0	25	25	75	25	100	50	50	75	75	50	75	26.5625	1	1	62.5	62.5	0	1	1	0	45.8333	2	7	1	0	1	1	1	56.9444
28	0	62	2	176	70	0	0	1	0	2	1	2	0	0	75	25	100	75	50	25	50	100	0	50	100	25	0	100	100	50	50	22.5981	0	1	54.1667	91.6667	2	1	2	0	83.3333	2	4	0	1	1	1	1	76.3889
30	1	62	3	171	60	0	1	0	1	2	0	2	75	0	100	25	100	100	0	100	25	25	100	0	0	0	100	100	0	25	100	20.5191	0	0	54.1667	41.6667	1	1	0	0	66.6667	2	4	0	1	1	0	1	54.1667
43	2	40	4	168	70	0	0	1	1	0	0	1	0	25	100	75	50	50	0	100	100	100	0	0	0	100	0	25	0	50	25	24.8016	1	0	83.3333	83.3333	0	2	2	0	37.5	0	9	1	0	1	1	1	68.0556
51	3	52	7	173	70	1	2	1	1	0	1	2	75	25	100	0	100	100	0	100	50	50	100	0	75	25	25	0	0	100	100	23.3887	2	0	41.6667	41.6667	2	0	0	0	87.5	1	18	3	1	0	0	1	58.3333
31	1	60	2	155	58	0	0	0	0	0	1	1	25	0	0	50	100	0	0	0	0	100	0	0	0	25	0	0	0	0	25	24.1415	1	1	8.33333	8.33333	0	0	0	1	37.5	1	8	1	0	0	0	0	15.2778
30	1	60	6	164	56	0	0	1	0	0	1	1	0	0	25	0	0	25	0	0	0	0	0	25	100	75	50	0	0	25	50	20.8209	0	1	87.5	33.3333	0	2	0	0	8.33333	1	4	0	0	1	0	0	43.0556
51	3	62	3	156	65	0	1	1	1	0	0	1	50	50	25	0	100	100	100	50	50	25	50	50	50	50	100	100	50	50	100	26.7094	1	1	75	75	2	2	2	1	54.1667	2	17	3	1	1	1	1	68.0556
31	1	48	7	149	63	0	0	0	1	2	0	2	0	25	50	50	100	25	0	75	50	0	50	100	100	50	100	50	0	25	0	28.3771	1	1	37.5	37.5	0	0	0	0	41.6667	0	7	1	0	0	0	0	38.8889
56	3	72	2	182	105	0	2	0	1	0	1	3	75	75	0	50	100	100	25	100	25	25	25	0	75	75	100	100	50	0	0	31.6991	2	0	54.1667	41.6667	1	1	0	0	66.6667	2	19	3	1	1	0	1	54.1667
27	0	48	7	146	64	0	1	0	0	0	0	2	100	100	100	0	50	25	50	100	25	100	100	25	0	100	0	0	50	0	0	30.0244	0	1	25	25	1	0	0	0	62.5	0	4	0	1	0	0	0	37.5
30	1	48	8	170	59	0	0	0	0	2	1	3	0	100	0	25	100	0	0	100	75	25	100	25	0	100	75	100	50	100	25	20.4152	1	0	37.5	37.5	0	0	0	0	37.5	0	9	1	0	0	0	0	37.5
31	1	70	2	167	58	0	0	1	0	0	0	1	25	25	25	25	100	25	25	25	25	100	100	25	50	50	50	25	25	50	75	20.7967	0	1	45.8333	45.8333	0	0	0	0	37.5	2	6	1	0	0	0	0	43.0556
36	1	58	8	179	70	0	0	1	0	0	0	2	75	0	100	25	100	100	50	100	50	100	100	75	0	50	50	100	100	100	50	21.847	1	0	87.5	75	1	2	2	0	66.6667	1	10	1	1	1	1	1	76.3889
51	3	70	2	164	55	0	2	1	1	0	0	1	75	25	25	100	25	75	75	25	25	0	100	50	75	100	100	100	0	50	75	20.4491	2	0	70.8333	70.8333	1	1	1	0	70.8333	2	9	1	1	1	1	1	65.2778
26	0	52	3	188	71	0	0	1	0	0	0	1	100	25	25	0	100	75	50	100	50	100	100	0	0	25	100	25	100	100	100	20.0883	0	0	75	75	2	2	2	0	70.8333	1	6	1	1	1	1	1	68.0556
43	2	62	2	178	78	0	0	1	1	0	1	0	0	50	75	100	100	0	50	100	100	0	100	50	75	25	25	25	50	50	0	24.6181	1	0	29.1667	29.1667	0	0	0	1	45.8333	2	11	2	0	0	0	0	33.3333
31	1	48	8	154	50	1	0	1	1	2	0	2	75	100	100	25	100	100	25	100	50	100	100	50	0	25	100	100	75	50	25	21.0828	1	0	62.5	62.5	2	1	1	0	79.1667	0	9	1	1	1	1	1	69.4444
45	2	72	8	167	56	0	0	1	1	2	0	2	100	100	100	0	100	100	50	100	0	100	100	50	0	75	100	100	50	25	25	20.0796	1	0	62.5	62.5	2	1	1	0	79.1667	2	11	2	1	1	1	1	69.4444
27	0	48	6	164	55	0	0	0	0	2	1	0	100	50	75	75	100	100	100	100	50	100	100	0	0	25	100	100	25	0	100	20.4491	0	1	75	58.3333	2	2	1	1	83.3333	0	4	0	1	1	1	1	72.2222
42	2	72	3	160	57	0	0	0	2	0	0	2	25	50	75	50	100	75	50	0	75	100	100	25	0	100	100	75	75	100	50	22.2656	1	1	87.5	91.6667	2	2	2	0	91.6667	2	10	1	1	1	1	1	90.2778
28	0	60	3	152	51	0	0	1	0	2	0	2	100	100	75	25	100	100	25	75	50	25	100	0	0	100	100	100	100	50	100	22.0741	0	1	91.6667	91.6667	2	2	2	0	83.3333	1	3	0	1	1	1	1	88.8889
29	0	36	2	177	65	0	0	1	0	0	0	2	25	25	25	25	0	75	25	100	50	75	50	50	100	25	100	100	50	75	25	20.7476	0	0	48.6111	41.6667	0	0	0	1	37.5	0	2	0	0	1	0	0	42.5926
30	1	48	3	161	58	0	0	0	0	2	1	3	100	50	0	0	0	75	0	0	25	100	0	25	50	75	100	25	25	0	100	22.3757	0	1	54.1667	41.6667	0	1	0	0	37.5	0	3	0	0	1	0	0	44.4444
31	1	52	3	152	60	0	0	0	0	2	1	3	100	25	0	0	0	50	0	0	0	100	100	25	50	50	25	50	50	50	100	25.9695	0	1	54.1667	41.6667	0	1	0	0	29.1667	1	3	0	0	1	0	0	41.6667
45	2	72	2	152	60	0	0	0	1	0	1	1	50	75	50	50	50	75	50	25	25	50	25	25	75	0	25	0	25	50	25	25.9695	1	1	20.8333	20.8333	1	0	0	0	55.8	2	6	1	1	0	0	0	33.3333
30	1	48	3	161	60	0	0	0	0	0	1	1	50	0	75	25	100	50	0	0	0	100	0	25	100	50	0	0	75	50	100	23.1473	1	1	45.8333	45.8333	0	0	0	1	41.6667	0	2	0	0	0	0	0	44.4444
30	1	48	2	170	68	0	0	0	0	0	0	2	25	0	0	50	25	75	75	75	25	25	50	25	25	50	25	25	50	25	50	23.5294	1	0	37.5	37.5	0	0	0	0	29.1667	0	2	0	0	0	0	0	34.7222
51	3	48	8	171	78	0	0	0	1	2	0	2	75	50	50	0	75	0	0	0	100	100	50	0	100	50	100	100	25	50	0	26.6749	2	0	54.1667	41.6667	2	1	0	0	83.3333	0	19	3	1	1	0	1	59.7222
44	2	58	3	170	65	0	2	0	1	0	1	1	0	0	50	25	100	0	50	100	100	100	100	100	75	0	0	100	50	0	100	22.4913	1	1	41.6667	41.6667	0	0	0	0	29.1667	1	8	1	0	0	0	0	37.5
32	1	32	2	158	50	0	0	0	0	2	1	1	75	25	75	0	0	25	50	75	75	25	25	100	100	0	75	25	25	50	50	20.0288	0	1	37.5	37.5	2	0	0	1	87.5	0	7	1	1	0	0	1	54.1667
53	3	60	2	161	95	0	0	0	1	0	1	2	100	100	100	25	0	75	100	100	100	25	50	25	0	50	0	100	0	75	0	36.6498	2	0	37.5	37.5	1	0	0	0	66.6667	1	12	2	1	0	0	0	47.2222
28	0	40	4	153	47	0	0	1	0	0	1	1	50	0	25	0	100	0	75	25	50	75	100	50	50	25	25	25	100	50	25	20.0777	0	1	41.6667	87.5	2	0	2	0	87.5	0	3	0	1	0	0	1	72.2222
30	1	58	8	168	65	0	0	1	0	0	1	1	0	0	0	0	50	25	25	25	50	25	0	50	75	50	100	0	0	25	25	23.03	1	0	33.3333	33.3333	0	0	0	0	12.5	1	4	0	0	0	0	0	26.3889
42	2	70	6	158	60	0	0	0	0	2	0	2	50	50	100	100	75	75	75	100	0	0	100	50	0	25	100	100	0	100	25	24.0346	0	0	91.6667	70.8333	2	2	1	1	87.5	2	9	1	1	1	1	1	79.1667
26	0	48	6	165	60	0	0	0	0	2	1	2	0	0	0	100	100	0	0	75	50	100	100	100	100	25	0	0	0	0	0	22.0386	0	1	4.16667	4.16667	0	0	0	0	33.3333	0	2	0	0	0	0	0	13.8889
27	0	30	2	167	58	1	0	1	0	0	0	2	0	25	50	0	50	75	50	0	50	50	25	50	75	25	75	75	50	75	75	20.7967	0	1	62.5	62.5	0	1	1	0	33.3333	0	4	0	0	1	1	1	52.7778
31	1	48	3	170	85	1	0	1	1	2	1	1	100	50	100	0	100	100	0	50	25	0	100	25	25	100	50	100	75	0	0	29.4118	1	0	66.6667	100	3	3	3	1	79.1667	0	7	1	1	1	1	1	100
26	0	52	5	154	51	1	0	0	1	0	0	2	25	25	50	25	100	0	50	25	50	50	0	50	50	25	50	25	50	25	75	21.5045	1	1	41.6667	41.6667	0	0	0	0	37.5	1	5	0	0	0	0	0	40.2778
30	1	52	5	152	70	1	0	1	0	0	1	2	50	75	75	25	100	75	50	75	25	100	25	0	50	0	100	50	50	50	75	30.2978	1	0	54.1667	45.8333	2	1	0	0	87.5	1	10	1	1	1	0	1	62.5
26	0	50	5	160	60	0	0	0	0	2	0	2	0	0	50	0	100	100	50	25	0	100	25	0	50	50	75	25	50	50	75	23.4375	0	1	54.1667	41.6667	2	1	0	0	87.5	1	3	0	1	1	0	1	61.1111
26	0	52	5	172	60	0	0	0	0	2	0	2	0	0	50	0	100	100	50	25	0	100	50	0	50	50	75	25	50	50	75	20.2812	0	1	100	100	2	3	1	1	100	1	3	0	1	1	1	1	100
30	1	72	2	167	57	0	0	1	0	0	0	1	100	0	50	25	100	100	0	100	100	100	100	0	0	100	100	100	50	0	75	20.4382	1	1	91.6667	70.8333	1	2	1	1	62.5	2	9	1	1	1	1	1	75
26	0	36	2	151	47	0	0	0	0	0	0	2	0	0	75	25	100	100	0	0	0	50	100	100	100	25	100	100	100	0	25	20.6131	0	0	58.3333	45.8333	0	1	0	0	45.8333	0	3	0	0	1	0	0	48.6111
42	2	48	6	165	60	0	0	1	0	0	0	2	25	50	50	50	100	75	50	100	100	50	75	25	25	25	75	100	50	25	0	22.0386	1	0	62.5	45.8333	2	3	0	1	66.6667	0	6	1	1	1	0	1	77.7778
40	2	30	2	154	52	0	1	1	2	0	0	2	50	0	100	100	100	50	50	100	50	100	100	0	0	100	100	50	75	50	25	21.9261	1	1	66.6667	66.6667	1	1	1	0	83.3333	0	6	1	1	1	1	1	66.6667
30	1	42	4	170	65	0	0	1	0	2	1	2	0	50	50	0	0	0	0	0	50	25	25	75	0	50	25	25	25	25	50	22.4913	0	0	87.5	33.3333	0	2	0	0	16.6667	0	5	0	0	1	0	0	45.8333
33	1	72	6	152	65	0	0	0	1	2	1	1	25	0	100	0	25	25	25	50	25	50	25	75	75	25	25	0	0	25	0	28.1337	1	1	12.5	100	0	0	3	0	29.1667	2	9	1	0	0	0	0	47.2222
30	1	70	3	158	50	0	0	1	0	0	1	2	50	0	0	0	100	75	25	0	25	0	75	0	100	25	0	0	25	0	25	20.0288	0	1	12.5	12.5	0	0	0	0	39.17	2	9	1	0	0	0	0	20.8333
26	0	72	2	149	50	0	1	1	0	0	0	2	100	100	100	50	100	100	25	100	0	100	100	0	0	25	100	100	25	25	50	22.5215	0	1	54.1667	45.8333	2	1	0	0	91.6667	2	4	0	1	1	0	1	63.8889
31	1	48	3	171	64	0	0	0	0	0	0	2	75	100	100	0	100	100	100	100	100	100	100	0	0	25	0	25	25	100	75	21.8871	0	1	41.6667	41.6667	2	0	0	0	83.3333	0	2	0	1	0	0	1	54.1667
26	0	52	5	153	53	0	0	0	0	0	0	2	100	50	100	25	75	75	0	100	100	100	100	0	0	25	0	100	0	50	75	22.6409	0	1	47.2222	47.2222	0	0	0	0	37.5	1	4	0	0	0	0	0	43.9815
30	1	52	5	151	47	0	0	1	0	2	0	2	0	0	25	25	50	50	0	50	25	0	25	50	100	50	0	100	25	100	75	20.6131	1	1	58.3333	58.3333	2	1	1	0	87.5	1	10	1	1	1	1	1	68.0556
34	1	32	2	152	54	0	0	0	1	0	1	2	50	0	50	0	25	25	75	0	25	25	0	0	100	50	25	25	25	25	25	23.3726	1	1	29.1667	29.1667	0	0	0	0	35.2	0	7	1	0	0	0	0	27.7778
28	0	72	3	167	60	0	0	1	0	0	0	2	75	100	100	0	100	75	0	100	25	0	50	50	50	50	100	75	0	50	100	21.5139	0	0	62.5	62.5	2	1	1	0	75	2	2	0	1	1	1	1	66.6667
31	1	50	5	161	52	0	1	1	1	0	0	2	50	50	50	50	100	100	50	50	75	100	100	50	0	100	100	100	75	50	50	20.061	1	1	79.1667	79.1667	1	2	2	0	83.3333	1	9	1	1	1	1	1	75
27	0	62	3	160	58	0	0	1	0	0	0	1	50	75	100	0	100	25	50	50	50	25	50	25	100	50	100	0	25	0	100	22.6562	0	1	47.2222	47.2222	0	0	0	0	47.2222	2	4	0	0	0	0	0	47.2222
43	2	70	3	157	54	0	0	0	0	0	0	2	100	75	100	25	100	100	100	100	100	100	100	25	0	75	100	75	25	100	75	21.9076	0	1	75	75	2	2	2	0	83.3333	2	8	1	1	1	1	1	77.7778
42	2	60	3	165	60	0	1	0	1	0	0	2	0	0	0	0	100	0	100	0	100	100	25	0	50	25	100	0	0	0	100	22.0386	2	1	37.5	37.5	0	0	0	1	37.5	1	10	1	0	0	0	0	30.5556
42	2	70	3	155	49	0	0	0	1	0	1	2	0	0	0	0	100	0	100	0	100	100	0	0	75	50	100	0	0	0	100	20.3954	1	1	41.6667	41.6667	0	0	0	0	33.3333	2	6	1	0	0	0	0	33.3333
42	2	36	2	175	70	0	0	0	1	0	1	0	0	25	0	0	25	50	0	0	0	0	0	0	100	0	0	0	50	0	0	22.8571	1	0	8.33333	8.33333	0	0	0	0	16.6667	0	3	0	0	0	0	0	11.1111
44	2	32	2	165	58	0	0	0	1	0	0	2	50	50	100	50	100	100	0	50	25	50	50	50	50	50	50	50	50	25	25	21.3039	1	1	41.6667	41.6667	2	0	0	0	83.3333	0	7	1	1	0	0	1	52.7778
30	1	30	2	167	62	0	0	0	0	0	1	2	0	0	0	0	0	0	25	0	25	25	25	0	50	25	25	25	25	25	50	22.231	0	0	29.1667	29.1667	0	0	0	0	0	0	4	0	0	0	0	0	19.4444
42	2	58	2	174	65	0	0	0	0	0	0	2	50	25	0	50	50	50	0	25	0	0	75	75	50	50	25	50	25	25	25	21.4692	1	1	33.3333	33.3333	0	0	0	0	37.5	1	10	1	0	0	0	0	34.7222
56	3	60	8	167	56	0	1	1	1	0	1	3	100	100	100	50	100	100	100	100	50	100	100	25	0	100	100	100	50	25	25	20.0796	2	1	66.6667	66.6667	2	1	1	0	91.6667	1	13	2	1	1	1	1	75
41	2	62	3	164	55	0	0	1	1	0	1	2	100	100	50	0	100	100	25	100	25	100	100	25	0	50	100	50	50	100	100	20.4491	1	1	75	75	2	2	2	0	83.3333	2	5	0	1	1	1	1	75
43	2	48	3	152	48	0	0	1	0	0	1	3	100	100	75	25	100	100	50	100	0	25	100	50	50	100	100	25	50	25	100	20.7756	1	1	66.6667	66.6667	2	1	1	0	83.3333	0	9	1	1	1	1	1	72.2222
44	2	48	3	160	80	0	0	1	1	2	0	2	100	100	100	100	100	100	100	100	100	100	100	50	0	100	100	100	100	100	100	31.25	1	0	87.5	70.8333	2	2	2	0	87.5	0	13	2	1	1	1	1	87.5
43	2	48	2	170	61	0	0	1	0	0	0	2	25	25	75	75	25	75	50	75	25	100	100	0	0	75	75	100	100	75	25	21.1073	0	0	75	75	0	2	2	0	37.5	0	9	1	0	1	1	1	62.5
51	3	40	4	170	66	0	1	1	1	2	1	2	75	50	75	0	100	75	0	50	0	100	100	0	0	25	100	50	0	0	50	22.8374	1	0	66.6667	100	3	3	3	0	83.3333	0	9	1	1	1	1	1	100
31	1	52	3	155	57	0	0	0	1	0	0	3	0	100	0	100	100	100	25	50	0	100	100	25	0	25	100	100	25	100	100	23.7253	1	1	75	75	2	2	2	0	83.3333	1	5	0	1	1	1	1	72.2222
43	2	62	8	156	63	0	2	1	1	0	1	3	50	75	100	0	100	100	25	100	50	0	100	25	25	75	0	75	75	25	25	25.8876	1	0	87.5	45.8333	1	2	0	0	70.8333	2	9	1	1	1	0	1	68.0556
31	1	52	5	155	48	0	0	0	0	0	1	2	75	25	25	0	75	50	25	50	25	75	50	50	50	25	50	50	50	25	75	19.9792	0	1	87.5	87.5	2	2	2	1	83.3333	1	10	1	1	1	1	1	86.1111
53	3	32	1	165	78	0	1	1	1	0	0	2	50	50	0	50	0	50	50	50	50	50	25	100	75	25	25	25	25	25	75	28.6501	1	0	33.3333	33.3333	0	0	0	0	33.3333	0	18	3	0	0	0	0	33.3333
42	2	72	3	165	57	0	1	0	1	0	0	1	100	100	100	100	100	100	100	100	100	100	100	75	100	100	100	100	100	100	100	20.9366	1	1	91.6667	87.5	2	2	2	0	83.3333	2	7	1	1	1	1	1	87.5
30	1	52	5	164	55	0	0	0	0	0	1	1	25	0	100	0	100	100	0	25	25	100	50	100	100	75	100	0	50	100	75	20.4491	1	1	87.5	83.3333	2	2	2	1	91.6667	1	10	1	1	1	1	1	87.5
28	0	60	2	171	66	0	0	1	0	0	1	2	100	100	50	50	100	100	50	75	50	50	100	50	0	50	25	0	0	0	0	22.571	0	0	12.5	12.5	2	0	0	0	83.3333	1	4	0	1	0	0	0	36.1111
28	0	48	5	155	48	0	0	1	0	0	1	1	0	50	0	0	100	50	0	0	50	25	0	0	50	25	50	25	0	0	75	19.9792	0	1	29.1667	29.1667	0	0	0	0	37.5	0	3	0	0	0	0	0	30.5556
42	2	48	2	152	47	0	1	0	2	2	0	2	75	75	100	50	100	100	0	100	25	100	75	25	0	50	100	25	50	0	0	20.3428	2	1	37.5	37.5	2	0	0	1	83.3333	0	18	3	1	0	0	1	52.7778
31	1	52	3	160	75	0	0	0	1	0	0	2	75	100	50	25	100	75	25	50	25	50	75	25	100	50	25	50	0	0	25	29.2969	2	1	25	25	1	0	0	0	70.8333	1	8	1	1	0	0	0	40.2778
30	1	40	4	155	52	0	0	0	0	2	1	2	0	0	0	25	50	25	50	0	50	25	0	50	100	0	25	50	0	0	50	21.6441	1	1	87.5	87.5	2	2	2	1	87.5	0	6	1	1	1	1	1	87.5
26	0	30	2	156	68	0	0	1	0	0	0	3	50	100	75	75	75	75	75	100	100	75	25	75	0	25	100	100	50	75	50	27.9421	0	1	66.6667	83.3333	0	1	2	0	25	0	3	0	0	1	1	1	58.3333
30	1	52	5	175	63	0	0	0	1	0	0	1	0	0	0	0	100	0	50	25	50	75	50	0	100	0	0	0	100	0	75	20.5714	1	1	29.1667	29.1667	0	0	0	0	33.3333	1	4	0	0	0	0	0	25
29	0	72	6	172	60	0	0	0	0	0	1	1	0	0	0	100	100	0	25	0	0	100	25	0	75	100	75	100	25	75	0	20.2812	0	1	62.5	62.5	2	1	1	0	91.6667	2	3	0	1	1	1	1	72.2222
26	0	70	2	165	67	0	0	1	0	0	1	1	50	25	25	50	100	25	0	25	0	0	100	50	75	25	0	25	100	25	50	24.6097	0	1	37.5	37.5	0	0	0	0	45.8333	2	2	0	0	0	0	0	40.2778
30	1	62	6	176	62	0	0	0	0	0	0	2	100	100	100	0	100	100	0	100	0	100	100	25	0	100	100	100	25	50	100	20.0155	0	1	79.1667	87.5	2	2	2	0	83.3333	2	6	1	1	1	1	1	83.3333
30	1	48	6	155	95	0	0	1	0	0	0	2	100	100	100	0	100	100	0	100	50	100	100	25	0	100	100	100	50	75	100	39.5421	1	0	87.5	87.5	2	2	2	0	83.3333	0	9	1	1	1	1	1	86.1111
51	3	48	6	152	51	0	1	0	1	0	0	2	100	100	100	0	100	100	0	100	0	100	100	50	0	0	100	100	100	25	100	22.0741	2	1	87.5	87.5	2	2	2	0	83.3333	0	16	3	1	1	1	1	86.1111
41	2	32	2	164	57	0	0	1	0	0	1	2	75	25	25	50	100	100	100	0	25	100	0	50	100	0	100	0	50	50	75	21.1927	1	1	48.6111	41.6667	0	0	0	0	37.5	0	6	1	0	0	0	0	42.5926
30	1	52	5	160	58	0	0	0	0	0	0	2	50	50	50	50	50	50	100	50	50	75	75	50	50	50	50	50	50	50	75	22.6562	2	0	54.1667	45.8333	2	1	0	0	87.5	1	9	1	1	1	0	1	63.8889
31	1	48	2	172	60	0	0	0	0	2	1	3	0	25	50	25	75	75	50	50	100	100	100	50	50	25	100	75	0	100	75	20.2812	0	1	62.5	62.5	0	1	1	0	41.6667	0	6	1	0	1	1	1	55.5556
50	3	70	2	157	57	0	1	0	1	0	0	1	75	25	75	50	100	0	100	75	75	75	75	25	75	25	50	50	50	75	75	23.1247	2	1	54.1667	41.6667	0	1	0	0	41.6667	2	8	1	0	1	0	0	45.8333
42	2	30	1	164	57	0	1	0	1	0	0	2	50	0	0	0	100	0	0	50	25	50	25	0	75	50	0	25	100	50	75	21.1927	1	1	45.8333	0	0	0	0	0	41.6667	0	8	1	0	1	0	0	23.6111
42	2	72	2	168	70	0	0	1	1	0	0	1	0	0	0	25	100	100	25	0	25	25	100	100	50	25	25	100	50	0	50	24.8016	1	1	41.6667	41.6667	0	0	0	0	37.5	2	7	1	0	0	0	0	40.2778
50	3	48	8	163	65	0	1	1	1	0	0	1	50	50	75	25	100	75	75	75	75	100	100	25	25	75	75	100	75	75	75	24.4646	2	1	83.3333	79.1667	1	2	2	0	62.5	0	18	3	1	1	1	1	75
27	0	60	8	153	53	0	0	1	0	0	1	2	25	50	0	0	100	100	0	100	50	0	75	50	0	75	100	100	50	0	75	22.6409	0	0	66.6667	66.6667	2	1	1	0	79.1667	1	4	0	1	1	1	1	72.2222
42	2	70	2	175	84	0	0	1	1	0	1	1	50	25	75	75	75	75	0	50	0	25	50	0	50	25	25	25	100	50	75	27.4286	1	0	47.2222	41.6667	1	0	0	0	62.5	2	9	1	1	1	0	1	50.463
42	2	62	8	155	50	0	0	1	1	0	0	0	25	25	25	25	75	25	25	25	25	100	100	50	0	100	100	50	75	25	100	20.8117	1	1	41.6667	41.6667	0	0	0	0	33.3333	2	10	1	0	0	0	0	38.8889
26	0	36	2	180	80	1	0	1	0	0	0	2	100	100	100	75	25	75	25	100	100	0	100	25	0	25	25	75	100	50	75	24.6914	0	0	58.3333	58.3333	2	1	1	0	79.1667	0	4	0	1	1	1	1	65.2778
43	2	48	6	166	60	0	0	1	1	0	0	2	75	100	100	25	0	0	0	0	0	25	0	25	0	100	100	100	50	25	50	21.7738	1	0	87.5	70.8333	2	2	1	1	66.6667	0	10	1	1	1	1	1	81.9444
42	2	60	8	176	66	0	1	1	2	0	1	0	25	25	25	25	75	25	25	25	25	100	100	25	0	100	100	25	75	50	100	21.3068	1	1	83.3333	83.3333	2	2	2	0	87.5	1	9	1	1	1	1	1	84.7222
30	1	48	2	163	80	0	0	1	0	0	1	1	50	0	25	100	100	25	25	0	0	25	0	0	100	0	0	75	50	75	0	30.1103	1	1	33.3333	33.3333	0	0	0	0	41.6667	0	4	0	0	0	0	0	36.1111
40	2	48	3	158	62	0	1	0	1	0	0	2	0	25	0	0	100	0	25	0	75	75	50	50	0	100	25	25	25	25	75	24.8358	1	1	45.8333	45.8333	0	0	0	0	20.8333	0	10	1	0	0	0	0	37.5
40	2	48	3	165	54	0	0	0	1	0	0	0	0	75	50	25	75	75	0	100	0	50	100	0	0	100	100	100	100	0	100	19.8347	1	1	83.3333	83.3333	0	2	2	0	37.5	0	6	1	0	1	1	1	68.0556
32	1	62	2	160	52	1	0	1	0	0	1	3	75	75	25	25	100	100	0	50	50	0	50	0	50	0	0	0	25	25	25	20.3125	0	1	12.5	12.5	2	0	0	0	83.3333	2	9	1	1	0	0	0	30.5556
42	2	30	2	162	57	1	1	0	1	2	0	3	100	25	25	0	100	75	50	50	100	100	25	0	75	100	100	100	25	25	25	21.7193	1	1	62.5	62.5	1	1	1	0	54.1667	0	6	1	1	1	1	1	59.7222
42	2	48	2	158	63	0	0	0	1	0	1	1	75	25	50	0	100	0	50	100	0	0	50	0	100	25	50	100	0	100	0	25.2363	1	1	45.8333	45.8333	0	0	0	0	41.6667	0	9	1	0	0	0	0	44.4444
30	1	70	6	154	56	0	0	0	0	0	0	3	50	75	75	25	100	50	0	50	100	50	100	0	0	25	50	25	50	100	25	23.6128	1	1	91.6667	45.8333	2	2	0	0	87.5	2	8	1	1	1	0	1	75
31	1	70	2	168	70	0	0	0	0	0	0	2	0	50	100	50	100	75	50	100	25	100	50	75	25	50	100	100	25	50	25	24.8016	1	1	58.3333	45.8333	1	1	0	0	62.5	2	4	0	1	1	0	1	55.5556
51	3	62	2	182	94	0	0	1	0	0	1	1	50	0	100	100	100	0	25	100	100	25	25	25	75	50	25	50	25	25	25	28.3782	2	0	33.3333	33.3333	1	0	0	0	58.3333	2	10	1	1	0	0	0	41.6667
45	2	70	2	166	59	0	0	1	1	0	0	2	0	25	75	50	100	100	0	50	75	100	100	0	100	0	100	0	75	25	75	21.4109	1	1	87.5	45.8333	1	2	0	1	58.3333	2	9	1	1	1	0	1	63.8889
29	0	72	3	168	65	0	0	1	0	0	0	2	0	0	50	50	100	100	25	75	75	100	100	50	0	100	50	100	100	100	100	23.03	0	1	91.6667	91.6667	0	2	2	1	41.6667	2	5	0	0	1	1	1	75
43	2	72	6	150	59	0	0	1	1	0	0	2	0	0	100	50	100	0	100	0	25	75	100	0	0	75	0	100	100	100	100	26.2222	1	1	79.1667	79.1667	2	2	2	0	87.5	2	10	1	1	1	1	1	81.9444
43	2	72	2	172	90	0	0	1	1	0	1	0	25	0	100	75	25	25	0	25	100	75	50	75	0	100	100	100	50	100	50	30.4218	1	0	70.8333	91.6667	2	2	2	0	66.6667	2	6	1	1	1	1	1	88.8889
57	3	70	2	161	58	0	0	1	0	0	0	2	50	100	100	50	0	75	0	75	0	100	50	100	0	0	100	25	25	25	0	22.3757	2	1	29.1667	29.1667	1	0	0	1	62.5	2	18	3	1	0	0	0	40.2778
42	2	60	3	175	67	0	0	0	0	0	0	2	0	0	100	100	100	50	25	100	100	100	100	50	50	50	100	100	100	100	100	21.8776	1	0	66.6667	91.6667	1	2	2	0	62.5	1	10	1	1	1	1	1	80.5556
27	0	70	2	155	49	0	0	0	0	0	1	1	25	0	0	25	100	50	50	50	50	75	50	25	100	0	50	0	0	50	50	20.3954	0	1	25	25	0	0	0	0	33.3333	2	3	0	0	0	0	0	27.7778
29	0	30	2	167	58	0	0	0	0	0	0	2	25	75	100	25	100	75	100	100	100	100	100	50	50	75	100	25	75	0	75	20.7967	0	1	100	58.3333	1	3	1	1	83.3333	0	3	0	1	1	1	1	75
39	1	72	2	164	57	0	0	0	1	0	0	3	50	0	75	25	100	25	0	50	0	50	100	25	0	50	100	0	25	75	75	21.1927	1	1	47.2222	47.2222	0	0	0	0	37.5	2	11	2	0	1	0	0	43.9815
43	2	62	2	161	75	0	0	0	1	0	0	1	25	25	25	0	100	25	25	25	25	100	0	0	75	0	0	25	0	25	75	28.9341	1	0	83.3333	20.8333	0	2	0	0	33.3333	2	8	1	0	1	0	0	45.8333
42	2	32	2	160	72	0	1	1	1	0	0	2	100	100	100	50	100	100	50	100	50	25	100	75	0	75	50	100	25	50	50	28.125	1	0	58.3333	58.3333	2	1	1	0	87.5	0	10	1	1	1	1	1	68.0556
31	1	48	3	170	70	0	0	1	1	0	0	2	0	0	100	75	50	0	0	0	0	75	0	50	100	0	0	75	0	100	100	24.2215	1	0	45.8333	45.8333	0	0	0	0	37.5	0	3	0	0	0	0	0	43.0556
32	1	60	2	165	57	0	0	1	1	0	1	2	75	50	50	25	100	75	0	100	25	75	100	0	25	0	50	25	0	50	75	20.9366	1	1	87.5	33.3333	3	2	0	1	62.5	1	8	1	1	1	0	1	61.1111
30	1	36	2	170	64	1	0	0	0	0	0	1	75	25	75	50	75	75	0	75	25	0	100	0	25	0	50	50	0	50	75	22.1453	0	1	37.5	37.5	1	0	0	0	62.5	0	3	0	1	0	0	0	45.8333
56	3	60	2	162	56	1	0	1	1	0	0	2	75	50	25	50	100	75	25	50	75	100	75	75	50	0	75	75	75	50	75	21.3382	2	1	58.3333	45.8333	1	1	0	0	62.5	1	14	2	1	1	0	1	55.5556
42	2	70	3	150	60	1	0	0	1	2	0	1	25	0	50	25	100	25	0	25	25	25	0	0	50	75	75	100	25	0	100	26.6667	0	0	62.5	62.5	0	1	1	0	37.5	2	10	1	0	1	1	1	54.1667
30	1	60	2	158	51	1	0	0	1	0	1	1	0	50	50	100	100	25	25	50	75	50	25	50	25	50	75	50	50	75	50	20.4294	1	1	58.3333	79.1667	0	1	2	0	33.3333	1	5	0	0	1	1	1	56.9444
56	3	40	1	168	72	1	1	0	1	0	0	3	100	50	75	25	100	100	100	100	0	25	100	0	0	25	100	100	0	0	75	25.5102	1	1	47.2222	41.6667	2	0	0	0	83.3333	0	16	3	1	1	0	1	54.6296
30	1	58	2	170	66	1	0	1	0	0	0	2	0	0	100	0	100	0	0	100	0	0	100	100	100	0	25	100	0	0	0	22.8374	0	0	20.8333	20.8333	0	0	0	0	33.3333	1	5	0	0	0	0	0	25
31	1	60	2	156	58	1	0	1	0	0	0	1	75	75	75	0	75	25	25	75	0	75	75	50	25	75	75	50	0	50	75	23.833	1	1	54.1667	41.6667	0	1	0	0	41.6667	1	5	0	0	1	0	0	45.8333
53	3	60	2	167	67	1	0	0	0	0	0	1	0	25	100	0	100	50	25	0	50	25	50	0	75	0	0	25	0	0	0	24.0238	2	1	4.16667	4.16667	0	0	0	0	37.5	1	15	2	0	0	0	0	18.0556
36	1	42	4	156	53	0	1	0	1	0	1	2	75	50	25	75	75	75	75	25	50	75	75	75	25	75	75	75	50	50	25	21.7784	1	1	58.3333	83.3333	2	1	2	0	87.5	0	10	1	1	1	1	1	76.3889
43	2	30	2	180	100	0	0	0	1	0	1	2	50	75	100	75	100	100	0	75	25	100	100	25	25	50	100	100	0	0	0	30.8642	1	1	41.6667	41.6667	2	0	0	0	83.3333	0	10	1	1	0	0	1	55.5556
53	3	48	2	171	64	0	1	1	1	0	0	3	25	100	100	75	0	75	100	75	100	0	100	50	0	50	100	100	0	100	0	21.8871	2	0	58.3333	45.8333	1	1	0	0	62.5	0	15	2	1	1	0	1	55.5556
56	3	32	1	137	52	0	1	1	1	0	1	1	0	25	50	0	100	100	25	50	25	100	75	25	50	75	75	100	0	0	100	27.7053	1	1	58.3333	45.8333	0	1	0	0	45.8333	0	8	1	0	1	0	1	50
26	0	60	2	170	60	0	0	1	0	0	0	1	50	0	50	25	100	100	50	50	50	50	25	50	25	75	100	100	0	0	50	20.7612	0	1	54.1667	41.6667	0	1	0	0	41.6667	1	5	0	0	1	0	0	45.8333
40	2	30	2	172	66	0	2	1	1	0	0	2	100	100	100	0	100	100	0	100	0	100	100	75	0	50	100	100	0	50	50	22.3094	1	1	58.3333	58.3333	2	1	1	0	87.5	0	6	1	1	1	1	1	68.0556
29	0	62	2	156	68	0	0	1	1	0	1	2	75	50	75	100	75	75	0	0	25	50	25	100	25	25	100	0	25	0	75	27.9421	0	1	87.5	37.5	2	2	0	0	83.3333	2	2	0	1	1	0	1	66.6667
31	1	62	2	152	70	0	0	0	1	0	0	2	100	100	100	25	50	75	100	100	50	75	100	25	0	25	100	100	0	25	50	30.2978	1	1	47.2222	41.6667	2	0	0	0	83.3333	2	4	0	1	1	0	1	54.6296
51	3	48	2	153	56	0	1	0	1	0	1	1	25	25	25	25	100	25	0	25	50	75	25	25	75	25	0	50	25	25	25	23.9224	2	0	25	25	0	0	0	0	37.5	0	16	3	0	0	0	0	29.1667
32	1	72	2	154	50	0	0	0	1	0	0	2	0	50	50	50	0	0	100	0	0	100	75	0	100	0	25	100	0	0	0	21.0828	1	1	20.8333	20.8333	0	0	0	0	40.3	2	6	1	0	0	0	0	22.2222
57	3	30	1	153	62	0	1	0	1	0	1	2	75	0	25	0	100	75	0	75	0	100	100	25	0	50	100	100	0	25	50	26.4855	1	1	0	0	0	0	0	0	0	0	17	3	0	0	0	0	0
28	0	62	8	170	65	0	1	1	0	0	1	0	100	100	75	100	100	100	100	100	100	100	100	100	0	100	100	75	75	100	75	22.4913	0	1	45.8333	87.5	2	0	2	0	83.3333	2	4	0	1	0	0	1	70.8333
30	1	48	8	163	59	0	0	1	0	0	0	1	100	100	100	50	100	100	25	100	0	100	100	50	25	100	100	100	25	50	100	22.2063	0	1	83.3333	83.3333	2	2	2	1	91.6667	0	9	1	1	1	1	1	86.1111
40	2	48	6	163	59	0	1	1	1	0	1	2	0	25	0	0	50	50	100	50	50	50	50	75	25	50	75	75	50	25	25	22.2063	1	1	87.5	87.5	2	2	2	0	87.5	0	11	2	1	1	1	1	87.5
45	2	48	2	156	80	0	0	0	1	0	1	2	0	25	0	25	75	25	50	25	25	25	50	0	50	25	0	25	50	25	0	32.8731	1	0	20.8333	20.8333	0	0	0	0	25	0	4	0	0	0	0	0	22.2222
29	0	58	2	165	68	0	0	0	0	0	0	1	75	75	75	0	25	75	75	75	75	50	50	0	50	25	100	75	0	25	50	24.977	0	1	45.8333	45.8333	0	0	0	0	41.6667	1	4	0	0	0	0	0	44.4444
51	3	48	6	156	75	0	0	0	1	2	1	1	0	25	25	25	75	0	75	75	75	25	25	0	50	25	100	0	100	50	25	30.8185	2	1	83.3333	41.6667	2	2	0	0	87.5	0	20	3	1	1	0	1	70.8333
31	1	70	2	149	65	0	1	1	1	0	0	2	50	75	75	50	100	75	0	75	50	75	75	0	25	50	75	75	50	75	25	29.278	2	1	58.3333	58.3333	1	1	1	0	70.8333	2	6	1	1	1	1	1	62.5
30	1	48	8	153	51	0	0	0	0	0	0	2	100	100	100	25	100	100	0	100	25	75	100	50	0	100	100	100	50	100	50	21.7865	0	0	75	83.3333	2	2	2	0	87.5	0	6	1	1	1	1	1	84.7222
26	0	48	7	172	60	0	0	0	0	0	0	1	0	0	25	0	100	50	100	0	100	100	100	50	75	0	50	0	50	100	100	20.2812	0	1	83.3333	37.5	2	2	0	1	87.5	0	3	0	1	1	0	1	69.4444
27	0	70	8	168	60	0	0	1	0	0	0	2	100	75	75	25	100	100	100	100	25	50	100	75	0	75	100	100	75	75	50	21.2585	0	1	79.1667	79.1667	2	2	2	0	83.3333	2	2	0	1	1	1	1	79.1667
43	2	58	8	156	63	0	0	1	0	0	1	2	100	100	100	100	75	75	100	100	25	75	100	100	25	25	100	100	50	50	25	25.8876	1	1	58.3333	58.3333	2	1	1	0	91.6667	1	10	1	1	1	1	1	69.4444
43	2	60	7	171	64	0	2	1	1	0	0	2	25	25	0	25	100	100	0	0	25	0	25	0	100	0	0	25	0	0	0	21.8871	1	0	70.8333	91.6667	0	2	2	0	45.8333	1	13	2	0	1	1	1	73.6111
42	2	70	8	161	68	0	0	1	1	2	0	1	100	100	0	0	100	100	75	100	0	50	100	25	100	100	100	100	0	50	0	26.2336	1	1	87.5	58.3333	1	2	1	0	83.3333	2	9	1	1	1	1	1	70.8333
31	1	48	8	167	59	0	0	0	0	2	1	2	0	100	100	100	100	100	100	100	100	100	100	100	0	100	100	100	0	100	100	21.1553	0	1	83.3333	87.5	3	3	2	0	100	0	8	1	1	1	1	1	90.2778
30	1	48	8	155	50	0	0	1	0	0	1	1	0	25	0	0	100	25	0	75	50	50	0	0	0	25	25	50	0	0	100	20.8117	1	1	25	33.3333	0	0	0	0	35	0	3	0	0	0	0	0	27.7778
56	3	48	8	172	60	1	0	1	0	0	0	2	0	100	0	75	25	50	75	100	0	75	0	0	50	75	50	50	25	50	0	20.2812	1	0	41.6667	41.6667	2	0	0	0	83.3333	0	10	1	1	0	0	1	55.5556
29	0	48	8	182	75	0	0	0	0	2	1	2	50	100	25	50	100	75	100	100	50	25	100	25	25	0	0	100	0	75	100	22.6422	0	1	25	25	2	0	0	0	87.5	0	3	0	1	0	0	0	45.8333
42	2	48	8	155	50	0	0	1	2	0	1	2	0	0	0	50	100	25	50	0	0	0	50	100	50	100	50	0	50	25	50	20.8117	2	1	45.8333	45.8333	0	0	0	0	29.1667	0	17	3	0	0	0	0	40.2778
30	1	48	8	152	57	0	0	1	0	0	1	2	75	75	50	75	75	25	25	75	50	50	50	25	0	50	25	50	50	50	25	24.6711	0	1	83.3333	41.6667	1	2	0	0	62.5	0	4	0	1	1	0	1	62.5
29	0	48	8	167	57	0	0	0	0	2	0	3	100	75	75	50	100	100	50	100	75	100	0	0	0	0	100	25	0	100	50	20.4382	0	1	45.8333	45.8333	2	0	0	1	83.3333	0	4	0	1	0	0	1	58.3333
43	2	52	8	164	60	0	1	0	1	0	1	0	0	0	25	0	25	0	0	25	50	25	50	0	100	0	50	50	50	0	25	22.3081	1	0	29.1667	29.1667	0	0	0	0	16.6667	1	5	0	0	0	0	0	22.2222
42	2	30	1	170	80	0	1	1	1	0	1	2	0	50	100	50	50	25	50	0	25	100	100	100	0	0	0	100	25	75	0	27.6817	2	1	0	0	0	0	0	0	0	0	12	2	0	0	0	0	0
43	2	70	6	158	51	0	0	0	1	2	0	2	0	0	0	0	50	25	0	0	50	25	50	50	25	50	25	0	25	25	0	20.4294	1	1	20.8333	20.8333	2	0	0	0	83.3333	2	11	2	1	0	0	0	41.6667
41	2	48	7	152	50	0	1	0	1	0	1	0	0	25	25	100	0	25	0	25	100	0	25	100	100	75	25	100	100	100	100	21.6413	1	1	91.6667	87.5	0	2	2	0	29.1667	0	10	1	0	1	1	1	69.4444
30	1	62	3	152	54	0	0	1	0	0	0	1	0	0	0	25	25	0	0	25	0	25	25	0	100	25	0	0	0	0	25	23.3726	1	1	87.5	91.6667	0	2	2	0	8.33333	2	10	1	0	1	1	1	62.5
31	1	60	2	160	58	0	0	1	0	0	1	3	0	50	0	0	100	0	50	0	25	100	100	75	75	25	50	0	25	0	50	22.6562	0	1	25	25	0	0	0	0	33.3333	1	8	1	0	0	0	0	25
31	1	52	5	172	60	0	0	0	0	0	0	2	0	50	25	25	100	25	0	0	25	25	25	25	75	25	25	25	0	0	75	20.2812	1	1	100	100	3	2	3	1	100	1	9	1	1	1	1	1	100
51	3	48	6	158	52	1	1	0	2	0	1	1	0	25	75	25	100	100	25	75	75	50	100	50	0	0	25	75	100	100	100	20.83	2	1	66.6667	66.6667	1	1	1	0	54.1667	0	12	2	1	1	1	1	62.5
31	1	40	4	152	58	0	0	1	1	0	0	2	0	25	50	0	75	50	0	25	25	75	50	0	100	25	25	100	25	0	50	25.1039	1	1	91.6667	87.5	2	2	2	0	87.5	0	9	1	1	1	1	1	88.8889
40	2	48	2	158	50	0	0	1	1	0	0	3	50	75	100	50	100	100	0	25	0	0	100	50	0	0	100	25	75	50	50	20.0288	1	1	47.2222	91.6667	2	0	2	1	87.5	0	9	1	1	1	0	1	75.463
57	3	72	6	150	45	0	1	0	1	0	1	1	0	0	50	100	50	50	50	0	50	25	100	0	100	100	25	25	75	100	100	20	2	1	70.8333	70.8333	2	1	1	0	87.5	2	15	2	1	1	1	1	76.3889
42	2	60	6	176	78	0	0	0	1	0	0	3	100	100	75	75	50	75	100	100	100	100	100	100	0	100	100	100	100	100	100	25.1808	1	1	91.6667	91.6667	2	2	2	1	83.3333	1	8	1	1	1	1	1	87.5
26	0	72	2	173	60	0	0	1	0	2	1	2	100	75	25	75	50	0	75	0	75	50	25	50	0	50	100	0	50	0	0	20.0474	0	0	33.3333	33.3333	0	0	0	0	45.8333	2	3	0	0	0	0	0	36.1111
30	1	52	3	143	46	0	0	1	0	2	1	2	100	100	100	100	100	100	75	75	75	100	100	75	25	100	100	100	100	50	50	22.495	0	1	91.6667	83.3333	2	2	2	0	87.5	1	3	0	1	1	1	1	87.5
42	2	48	2	161	52	0	0	1	0	0	0	3	100	100	100	100	25	75	25	50	25	0	100	0	0	75	100	100	50	0	50	20.061	0	1	62.5	62.5	2	1	1	0	83.3333	0	5	0	1	1	1	1	69.4444
27	0	48	3	172	65	0	1	0	0	0	0	2	0	0	0	75	25	50	0	25	25	100	50	75	100	0	100	100	100	0	100	21.9713	0	1	66.6667	66.6667	0	1	1	0	25	0	3	0	0	1	1	1	52.7778
27	0	48	8	152	48	0	0	1	0	0	1	3	100	0	100	50	100	100	0	100	100	0	0	50	75	25	0	50	25	50	75	20.7756	0	0	66.6667	87.5	2	2	2	0	66.6667	0	6	1	1	1	1	1	84.7222
30	1	70	2	165	169	1	0	0	1	0	0	0	75	100	100	100	50	50	100	25	100	25	100	100	0	100	100	100	100	50	25	62.0753	1	1	79.1667	79.1667	2	2	2	0	83.3333	2	9	1	1	1	1	1	79.1667
[truncated: 1 more columns]
